# Supplementary material for: Slow magnetic relaxation and luminescence properties in neodymium(iii)-4,4,4-trifluoro-1-(2-naphthyl)butane-1,3-dionato complexes incorporating bipyridyl ligands
Source: Royal Society of Chemistry journal article supplement (doi:10.1039/d1nj02583j), 2021-01-01
Supplement: d1nj02583j1.pdf [file d1nj02583j1.pdf]

# ELECTRONIC SUPPLEMENTARY INFORMATION (ESI)

## Slow magnetic relaxation and luminescence properties in neodymium(III)-4,4,4-trifluoro-1-(2-naphthyl)butane-1,3- dionato complexes incorporating bipyridyl ligands†

Ramon Vicente,<sup>\*a</sup> Ànnia Tubau,<sup>a</sup> Saskia Speed,<sup>a</sup> Franz A. Mautner,<sup>\*b</sup> Florian Bierbaumer,<sup>b</sup> Roland C. Fischer<sup>c</sup> and Salah S. Massoud<sup>\*,d,f</sup>

<sup>a</sup> *Departament de Química Inorgànica i Orgànica, Universitat de Barcelona, Martí i Franquès 1-11, E-31321 Barcelona, Spain*

<sup>b</sup> *Institut für Physikalische and Theoretische Chemie, Technische Universität Graz, A-8010 Graz, Austria*

<sup>c</sup> *Institut für Anorganische Chemie, Technische Universität Graz, Stremayrgasse 9/V, A-8010 Graz, Austria*

<sup>d</sup> *Department of Chemistry, University of Louisiana at Lafayette, P.O. Box 43700, Lafayette, LA 70504, U.S.A.*

<sup>f</sup> *Department of Chemistry, Faculty of Sciences, Alexandria University, Moharam Bey 21511, Alexandria, Egypt*

<sup>\*</sup> *Correspondence: [rvicente@ub.edu](mailto:rvicente@ub.edu) (R.V.); [mautner@tugraz.at](mailto:mautner@tugraz.at) (F.A.M.); [ssmassoud@louisiana.edu](mailto:ssmassoud@louisiana.edu) (S.S.M.); Tel.: +34 934039134 (R.V.); +43-316-873-32270 (F.A.M.); +1-337-482-5672 (S.S.M.); Fax: +34 93407725 (R.V.); +43-316-873-8225 (F.A.M.); +1-337-482-5676 (S.S.M.)*

### Table of content

|                                                                                                                                                                         |       |
|-------------------------------------------------------------------------------------------------------------------------------------------------------------------------|-------|
| <b>Figs S1-S5.</b> PXRD pattern of <b>1-5</b> .....                                                                                                                     | 2-4   |
| <b>Fig. S6.</b> Perspective view of Nd <sup>2+</sup> polyhedron (left) and coordination figure (right) of <b>1</b> ....                                                 | 5     |
| <b>Figs. S7-S12.</b> Packing plots of <b>1-5</b> .....                                                                                                                  | 6-8   |
| <b>Fig. S13.</b> $\chi_M''$ versus T values at dc fields up to 0.4 T of <b>3</b> . Oscillating ac field of $4 \times 10^{-4}$ T at 1488 Hz.....                         | 9     |
| <b>Table S1.</b> Shape calculations of <b>2-5</b> .....                                                                                                                 | 9     |
| <b>Tables S2-S7.</b> Non-coordinative interactions in <b>1-5</b> .....                                                                                                  | 10-27 |
| <b>Table S8.</b> Relaxation parameters values for the best fit of $\chi_M''$ and $\chi_M'$ vs. frequency using the generalised Debye model for compound <b>2</b> .....  | 33    |
| <b>Table S9.</b> Relaxation parameters values for the best fit of $\chi_M''$ and $\chi_M'$ vs. frequency using the generalised Debye model for compound <b>4</b> .....  | 33    |
| <b>Table S10.</b> Relaxation parameters values for the best fit of $\chi_M''$ and $\chi_M'$ vs. frequency using the generalised Debye model for compound <b>5</b> ..... | 34    |

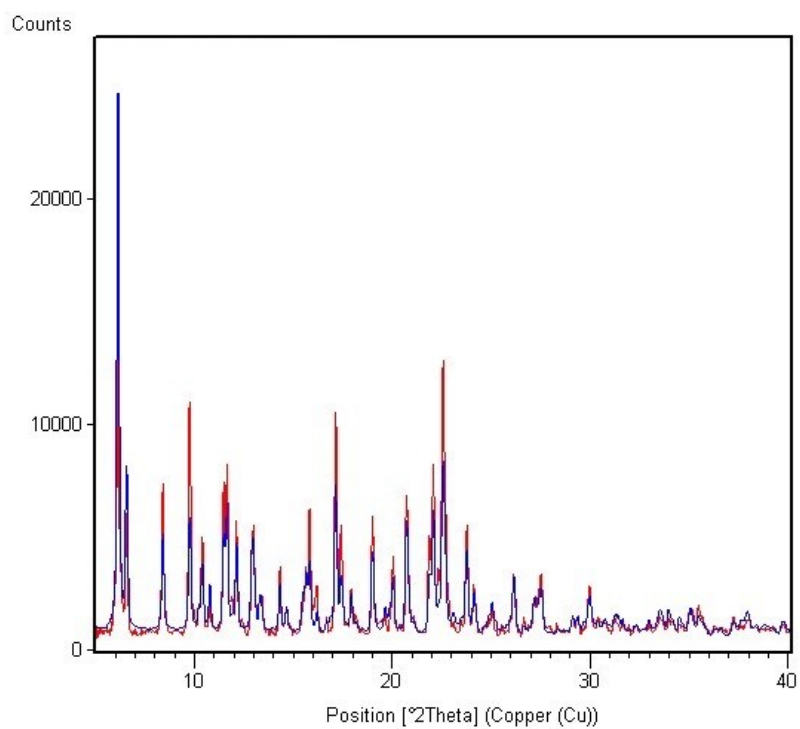

**Fig. S1** Observed (red) and simulated (blue) PXRD of **1**.

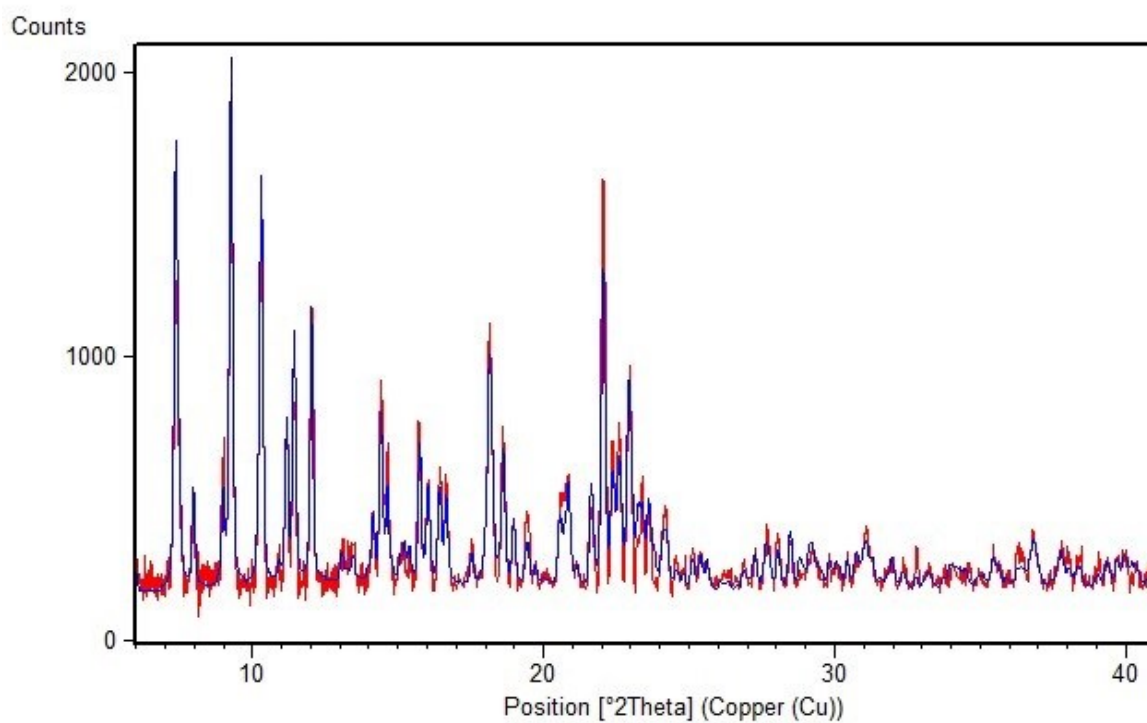

**Fig. S2** Observed (red) and simulated (blue) PXRD of **2**.

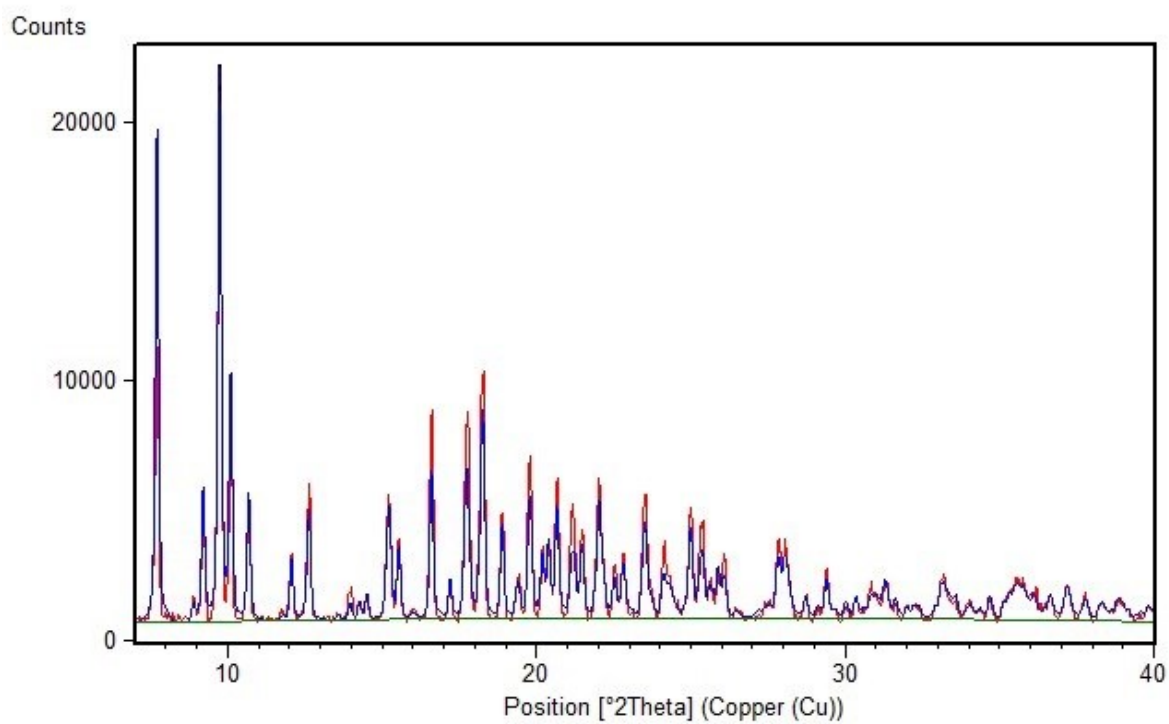

**Fig. S3** Observed (red) and simulated (blue) PXR D of **3**.

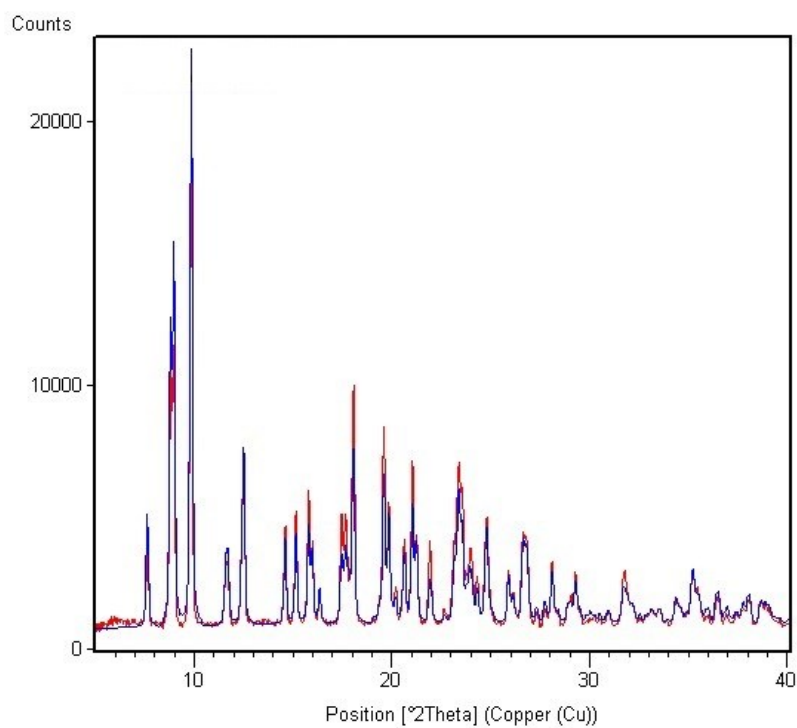

**Fig. S4** Observed (red) and simulated (blue) PXR D of **4**.

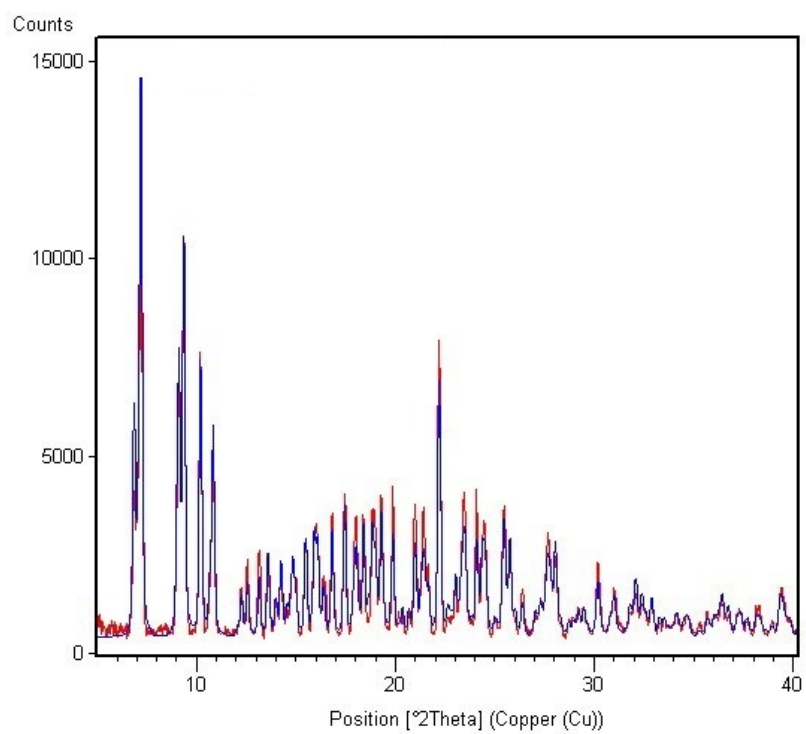

**Fig. S5** Observed (red) and simulated (blue) PXRD of **5**.

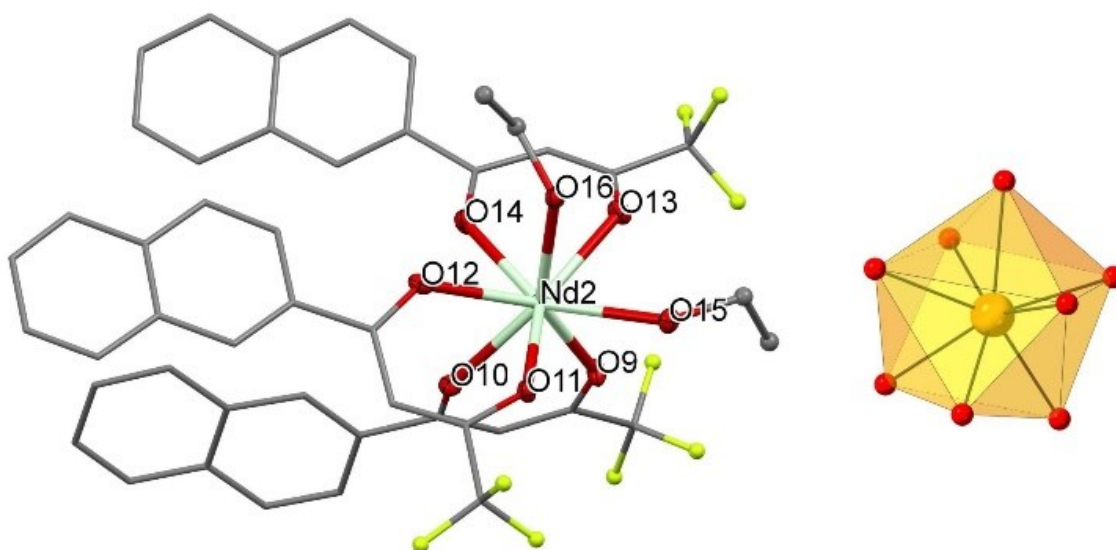

**Fig. S6** Perspective view of Nd2 polyhedron (left) and coordination figure (right) of **1**.

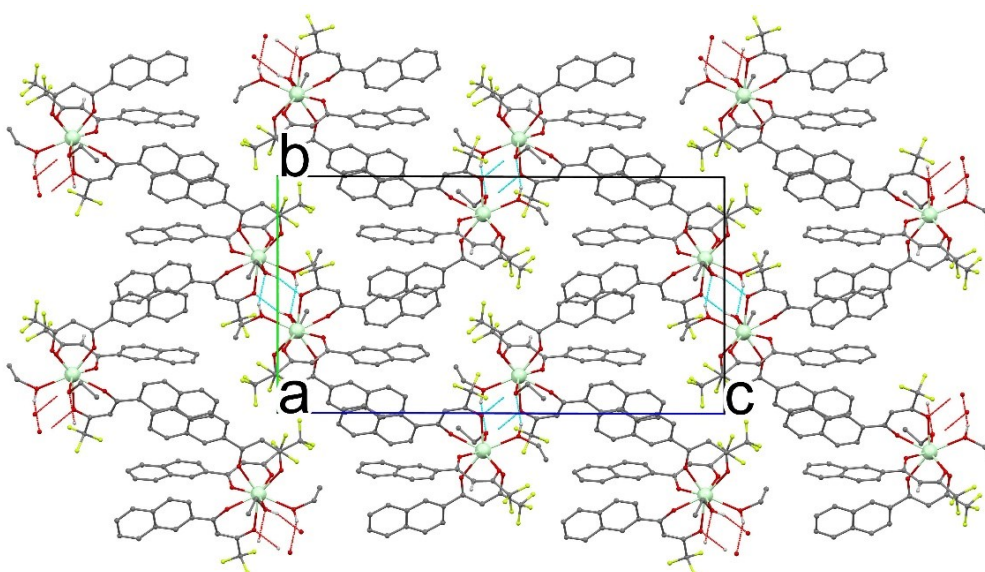

**Fig. S7** Packing plot of **1**.

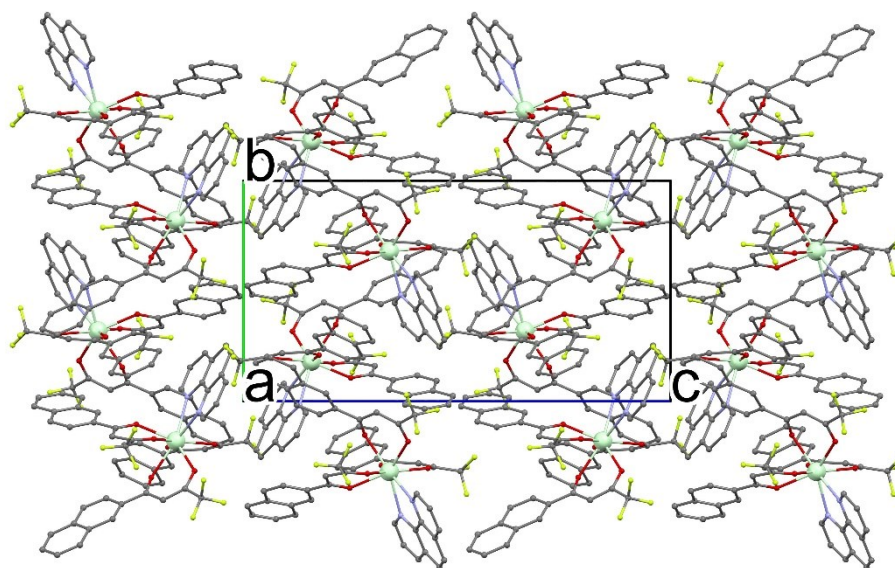

**Fig. S8** Packing plot of **2**.

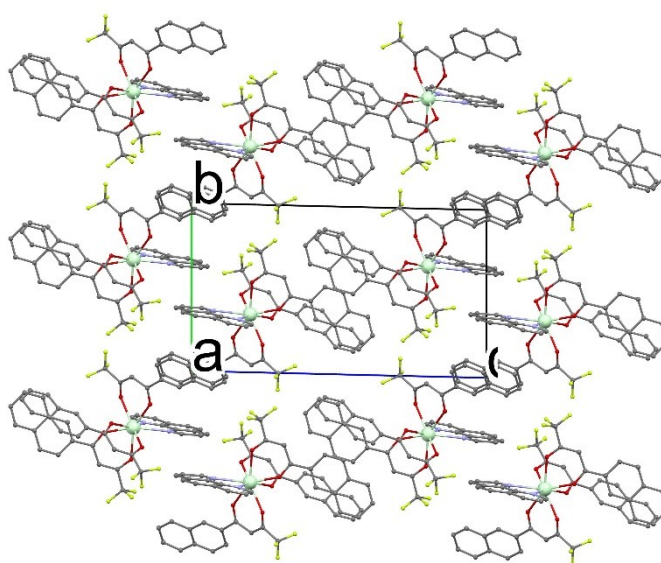

**Fig. S9** Packing plot of **2a**.

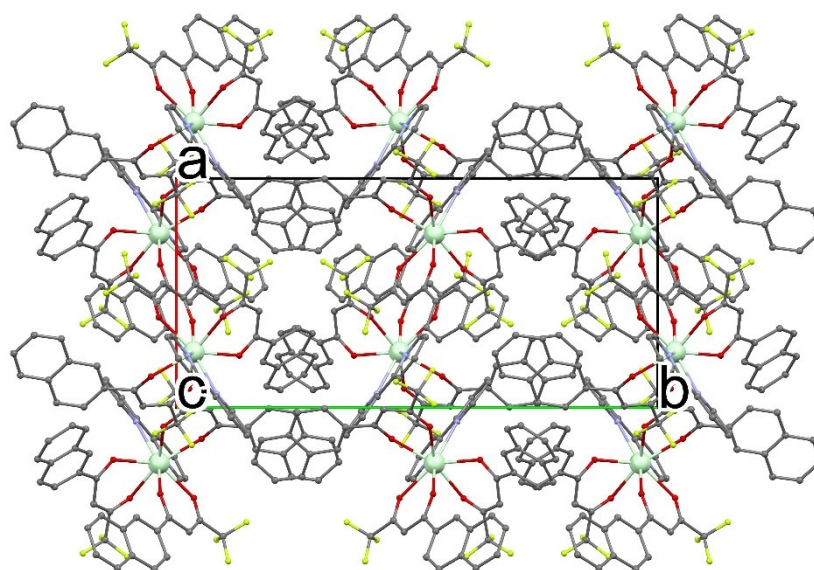

**Fig. S10** Packing plot of **3**.

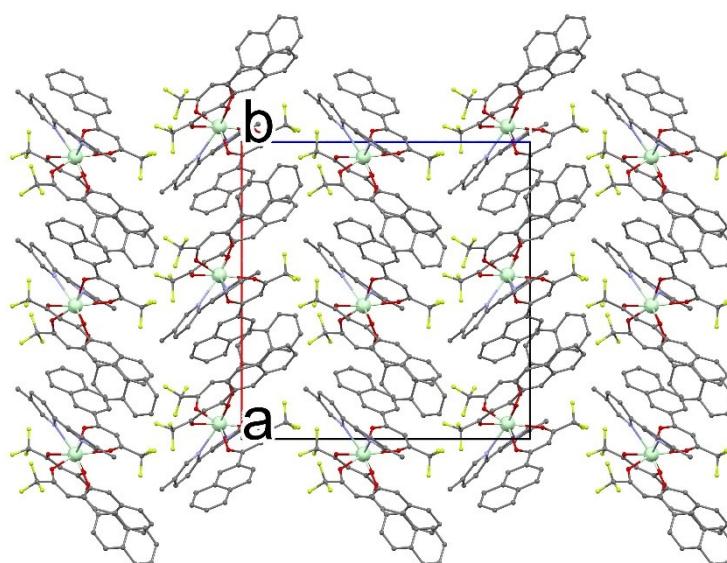

**Fig. S11** Packing plot of **4**.

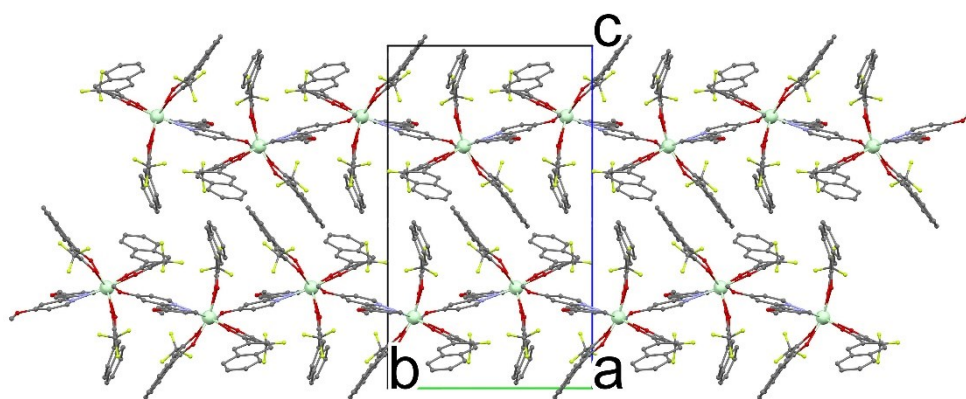

**Fig. S12** Packing plot of **5**.



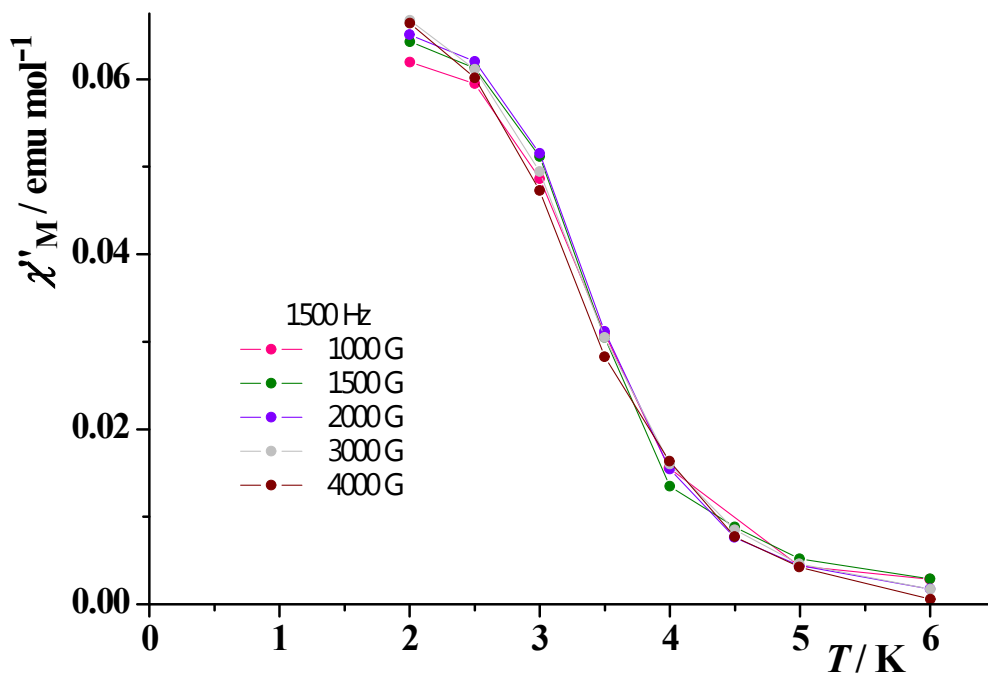

**Fig. S13**  $\chi_M''$  versus T values at dc fields up to 0.4 T of **3**. Oscillating ac field of  $4 \times 10^{-4}$  T at 1488 Hz.

**Table S1.** Continuous shape measures (CShM's) using SHAPE software for compounds **2-5**.

|                |                 | <b>2</b> | <b>2a</b> | <b>3</b> | <b>4</b> | <b>5</b> |
|----------------|-----------------|----------|-----------|----------|----------|----------|
| <b>TDD-8</b>   | D <sub>2d</sub> | 2.094    | 2.389     | 1.294    | 2.309    | 0.815    |
| <b>SAPR-8</b>  | D <sub>4d</sub> | 0.826    | 0.921     | 1.391    | 0.849    | 3.362    |
| <b>BTPR-8</b>  | C <sub>2v</sub> | 2.584    | 2.482     | 1.690    | 1.967    | 2.662    |
| <b>JBTPR-8</b> | C <sub>2v</sub> | 3.135    | 2.973     | 2.265    | 2.525    | 3.399    |

**Table S2.** Non-coordinative interactions in **1**.

|                       |     |     |     |     |     |     |     |     |     |     |     |     |     |     |     |     |     |     |     |     |
|-----------------------|-----|-----|-----|-----|-----|-----|-----|-----|-----|-----|-----|-----|-----|-----|-----|-----|-----|-----|-----|-----|
| 6-Membered Ring (1)   | C5  | --> | C6  | --> | C7  | --> | C12 | --> | C13 | --> | C14 | --> |     |     |     |     |     |     |     |     |
| 6-Membered Ring (2)   | C7  | --> | C8  | --> | C9  | --> | C10 | --> | C11 | --> | C12 | --> |     |     |     |     |     |     |     |     |
| 6-Membered Ring (3)   | C19 | --> | C20 | --> | C21 | --> | C26 | --> | C27 | --> | C28 | --> |     |     |     |     |     |     |     |     |
| 6-Membered Ring (4)   | C21 | --> | C22 | --> | C23 | --> | C24 | --> | C25 | --> | C26 | --> |     |     |     |     |     |     |     |     |
| 6-Membered Ring (5)   | C33 | --> | C34 | --> | C35 | --> | C40 | --> | C41 | --> | C42 | --> |     |     |     |     |     |     |     |     |
| 6-Membered Ring (6)   | C35 | --> | C36 | --> | C37 | --> | C38 | --> | C39 | --> | C40 | --> |     |     |     |     |     |     |     |     |
| 10-Membered Ring (7)  | C5  | --> | C6  | --> | C7  | --> | C8  | --> | C9  | --> | C10 | --> | C11 | --> | C12 | --> | C13 | --> | C14 | --> |
| 10-Membered Ring (8)  | C19 | --> | C20 | --> | C21 | --> | C22 | --> | C23 | --> | C24 | --> | C25 | --> | C26 | --> | C27 | --> | C28 | --> |
| 10-Membered Ring (9)  | C33 | --> | C34 | --> | C35 | --> | C36 | --> | C37 | --> | C38 | --> | C39 | --> | C40 | --> | C41 | --> | C42 | --> |
| 6-Membered Ring (10)  | C51 | --> | C52 | --> | C53 | --> | C58 | --> | C59 | --> | C60 | --> |     |     |     |     |     |     |     |     |
| 6-Membered Ring (11)  | C53 | --> | C54 | --> | C55 | --> | C56 | --> | C57 | --> | C58 | --> |     |     |     |     |     |     |     |     |
| 6-Membered Ring (12)  | C65 | --> | C66 | --> | C67 | --> | C68 | --> | C73 | --> | C74 | --> |     |     |     |     |     |     |     |     |
| 6-Membered Ring (13)  | C68 | --> | C69 | --> | C70 | --> | C71 | --> | C72 | --> | C73 | --> |     |     |     |     |     |     |     |     |
| 6-Membered Ring (14)  | C79 | --> | C80 | --> | C81 | --> | C86 | --> | C87 | --> | C88 | --> |     |     |     |     |     |     |     |     |
| 6-Membered Ring (15)  | C81 | --> | C82 | --> | C83 | --> | C84 | --> | C85 | --> | C86 | --> |     |     |     |     |     |     |     |     |
| 10-Membered Ring (16) | C51 | --> | C52 | --> | C53 | --> | C54 | --> | C55 | --> | C56 | --> | C57 | --> | C58 | --> | C59 | --> | C60 | --> |
| 10-Membered Ring (17) | C65 | --> | C66 | --> | C67 | --> | C68 | --> | C69 | --> | C70 | --> | C71 | --> | C72 | --> | C73 | --> | C74 | --> |
| 10-Membered Ring (18) | C79 | --> | C80 | --> | C81 | --> | C82 | --> | C83 | --> | C84 | --> | C85 | --> | C86 | --> | C87 | --> | C88 | --> |

**Analysis of Short Ring-Interactions with Cg-Cg Distances < 6.0 Ang., Alpha < 20.000 Deg. and Beta < 60.0 Deg.**

- Cg(I) = Plane number I (= ring number in () above)
- Alpha = Dihedral Angle between Planes I and J (Deg)
- Beta = Angle Cg(I)-->Cg(J) or Cg(I)-->Me vector and normal to plane I (Deg)
- Gamma = Angle Cg(I)-->Cg(J) vector and normal to plane J (Deg)
- Cg-Cg = Distance between ring Centroids (Ang.)
- CgI\_Perp = Perpendicular distance of Cg(I) on ring J (Ang.)
- CgJ\_Perp = Perpendicular distance of Cg(J) on ring I (Ang.)
- Slippage = Distance between Cg(I) and Perpendicular Projection of Cg(J) on Ring I (Ang).

| Cg(I) | Cg(J) | [ARU(J)] | Cg-Cg    | Alpha    | Beta    | Gamma | CgI_Perp | CgJ_Perp | Slippage   |
|-------|-------|----------|----------|----------|---------|-------|----------|----------|------------|
| Cg1   | Cg5   | [1655]   | 4,639(3) | 6,3327   | 66,5(3) | 5,9   | 71,2     | 1,495(2) | 4,614(2)   |
| Cg1   | Cg6   | [1655]   | 5,887(3) | 6,2591   | 66,7(3) | 21    | 75,5     | 1,473(2) | 5,495(2)   |
| Cg1   | Cg9   | [1655]   | 5,157(3) | 6,2822   | 66,6(2) | 11,4  | 73,3     | 1,486(2) | 5,0556(18) |
| Cg1   | Cg12  | [2666]   | 5,049(3) | -8,165   | 1,8(3)  | 45,9  | 47,6     | 3,406(2) | 3,516(3)   |
| Cg1   | Cg13  | [2666]   | 3,873(4) | -8,2075  | 1,6(3)  | 27,2  | 28,4     | 3,407(2) | 3,445(3)   |
| Cg1   | Cg13  | [2766]   | 5,991(4) | -14,8359 | 1,6(3)  | 57    | 57,5     | 3,222(2) | 3,260(3)   |
| Cg1   | Cg17  | [2666]   | 4,332(3) | -8,1772  | 1,7(2)  | 36,5  | 38,1     | 3,408(2) | 3,481(2)   |
| Cg2   | Cg5   | [1655]   | 5,345(3) | 6,3327   | 65,0(3) | 30,1  | 71,4     | 1,703(2) | 4,624(2)   |
| Cg2   | Cg6   | [1655]   | 5,525(4) | 6,2591   | 65,2(3) | 8,2   | 72,3     | 1,679(2) | 5,468(2)   |
| Cg2   | Cg9   | [1655]   | 5,297(3) | 6,2822   | 65,1(2) | 17,7  | 71,4     | 1,690(2) | 5,0471(18) |
| Cg2   | Cg12  | [2666]   | 3,822(4) | -8,165   | 2,9(3)  | 22,9  | 23,7     | 3,498(3) | 3,521(3)   |
| Cg2   | Cg13  | [2666]   | 3,989(4) | -8,2075  | 2,6(3)  | 31,4  | 29       | 3,490(3) | 3,406(3)   |
| Cg2   | Cg17  | [2666]   | 3,711(3) | -8,1772  | 2,8(2)  | 21    | 19,5     | 3,497(3) | 3,464(2)   |
| Cg3   | Cg5   | [1555]   | 5,370(3) | 9,4061   | 64,7(3) | 22,6  | 77,2     | 1,193(2) | 4,958(2)   |
| Cg3   | Cg6   | [1555]   | 4,873(4) | 9,3644   | 65,0(3) | 13,3  | 76       | 1,182(2) | 4,743(2)   |
| Cg3   | Cg7   | [1555]   | 5,978(3) | 12,0198  | 15,6(2) | 58,9  | 57,3     | 3,231(3) | 3,086(2)   |
| Cg3   | Cg9   | [1555]   | 4,978(3) | 9,3727   | 64,9(2) | 13    | 76,2     | 1,187(2) | 4,8494(18) |

|      |      |        |          |          |           |      |      |            |            |
|------|------|--------|----------|----------|-----------|------|------|------------|------------|
| Cg3  | Cg14 | [2676] | 4,855(3) | -20,8219 | 2,3(3)    | 45,8 | 43,8 | 3,504(3)   | 3,382(2)   |
| Cg3  | Cg15 | [2676] | 3,773(4) | -20,8087 | 3,4(3)    | 22,1 | 21,6 | 3,508(3)   | 3,495(3)   |
| Cg3  | Cg18 | [2676] | 4,174(3) | -20,8264 | 2,8(2)    | 34,5 | 32,6 | 3,517(3)   | 3,4411(19) |
| Cg4  | Cg6  | [1555] | 5,027(4) | 9,3644   | 64,3(3)   | 19,3 | 70,1 | 1,712(3)   | 4,743(2)   |
| Cg4  | Cg9  | [1555] | 5,659(3) | 9,3727   | 64,2(2)   | 30,5 | 72,3 | 1,720(3)   | 4,8751(18) |
| Cg4  | Cg14 | [2676] | 3,796(4) | -20,8219 | 1,0(3)    | 25,7 | 25,1 | 3,438(3)   | 3,421(2)   |
| Cg4  | Cg15 | [2676] | 4,121(4) | -20,8087 | 1,9(3)    | 32,4 | 34,3 | 3,404(3)   | 3,477(3)   |
| Cg4  | Cg18 | [2676] | 3,771(3) | -20,8264 | 1,4(3)    | 23,7 | 24,4 | 3,433(3)   | 3,4515(19) |
| Cg5  | Cg3  | [1455] | 5,906(3) | 10,8346  | 64,7(3)   | 43,7 | 72,9 | 1,737(2)   | 4,266(2)   |
| Cg5  | Cg12 | [2666] | 5,695(3) | -8,165   | 66,6(3)   | 20,5 | 76,2 | 1,358(2)   | 5,334(3)   |
| Cg5  | Cg13 | [2666] | 4,807(3) | -8,2075  | 66,3(3)   | 9,4  | 73,3 | 1,383(2)   | 4,742(3)   |
| Cg5  | Cg15 | [2576] | 5,277(3) | -14,2909 | 63,0(3)   | 23,6 | 67,7 | 1,998(2)   | 4,835(2)   |
| Cg5  | Cg17 | [2666] | 5,125(3) | -8,1772  | 66,5(2)   | 10,6 | 74,5 | 1,372(2)   | 5,037(2)   |
| Cg5  | Cg18 | [2576] | 5,975(3) | -14,2406 | 63,6(2)   | 33,9 | 71   | 1,942(2)   | 4,9598(18) |
| Cg6  | Cg12 | [2666] | 5,348(3) | -8,165   | 66,8(3)   | 4,9  | 64,4 | 2,309(2)   | 5,328(3)   |
| Cg6  | Cg13 | [2666] | 5,502(3) | -8,2075  | 66,5(3)   | 30,6 | 65   | 2,324(2)   | 4,738(3)   |
| Cg6  | Cg14 | [2576] | 5,558(3) | -14,1779 | 64,3(3)   | 23,6 | 73,7 | 1,564(2)   | 5,094(2)   |
| Cg6  | Cg15 | [2576] | 4,887(3) | -14,2909 | 63,2(3)   | 7,8  | 70,1 | 1,665(2)   | 4,843(2)   |
| Cg6  | Cg17 | [2666] | 5,285(3) | -8,1772  | 66,7(2)   | 17,8 | 64   | 2,320(2)   | 5,032(2)   |
| Cg6  | Cg18 | [2576] | 5,088(3) | -14,2406 | 63,8(2)   | 12,5 | 71,4 | 1,621(2)   | 4,9682(18) |
| Cg7  | Cg3  | [1555] | 5,978(3) | 17,5291  | 15,6(2)   | 57,3 | 58,9 | 3,0863(19) | 3,231(3)   |
| Cg7  | Cg5  | [1655] | 4,851(3) | 6,3327   | 65,8(2)   | 18,2 | 70,8 | 1,5977(18) | 4,609(2)   |
| Cg7  | Cg6  | [1655] | 5,574(3) | 6,2591   | 66,0(2)   | 11   | 73,6 | 1,5746(18) | 5,472(2)   |
| Cg7  | Cg9  | [1655] | 5,081(3) | 6,2822   | 65,84(17) | 7,1  | 71,8 | 1,5869(18) | 5,0416(18) |
| Cg7  | Cg12 | [2666] | 4,309(3) | -8,165   | 2,3(2)    | 35   | 36,7 | 3,4541(19) | 3,529(3)   |
| Cg7  | Cg13 | [2666] | 3,738(3) | -8,2075  | 2,0(2)    | 23,2 | 22,6 | 3,4502(19) | 3,437(3)   |
| Cg7  | Cg17 | [2666] | 3,845(3) | -8,1772  | 2,15(18)  | 25,1 | 26   | 3,4547(19) | 3,483(2)   |
| Cg8  | Cg5  | [1555] | 5,812(3) | 9,4061   | 64,4(2)   | 31,2 | 75,5 | 1,4569(19) | 4,969(2)   |
| Cg8  | Cg6  | [1555] | 4,794(3) | 9,3644   | 64,6(2)   | 9,6  | 72,4 | 1,4464(19) | 4,726(2)   |
| Cg8  | Cg9  | [1555] | 5,184(3) | 9,3727   | 64,51(17) | 20,8 | 73,7 | 1,4531(19) | 4,8462(18) |
| Cg8  | Cg14 | [2676] | 4,185(3) | -20,8219 | 1,6(2)    | 35,2 | 33,9 | 3,474(2)   | 3,421(2)   |
| Cg8  | Cg15 | [2676] | 3,759(3) | -20,8087 | 2,6(2)    | 21,3 | 23,1 | 3,459(2)   | 3,504(3)   |
| Cg8  | Cg18 | [2676] | 3,788(3) | -20,8264 | 2,03(18)  | 23,8 | 23,3 | 3,478(2)   | 3,4648(19) |
| Cg9  | Cg3  | [1455] | 5,889(3) | 10,8346  | 64,9(2)   | 43,4 | 71,7 | 1,8451(18) | 4,278(2)   |
| Cg9  | Cg12 | [2666] | 5,387(3) | -8,165   | 66,7(2)   | 8,3  | 70,1 | 1,8334(18) | 5,330(3)   |
| Cg9  | Cg13 | [2666] | 5,018(3) | -8,2075  | 66,4(2)   | 19,1 | 68,3 | 1,8537(18) | 4,742(3)   |
| Cg9  | Cg15 | [2576] | 4,937(3) | -14,2909 | 63,1(2)   | 11,4 | 68,2 | 1,8308(18) | 4,840(2)   |
| Cg9  | Cg17 | [2666] | 5,059(3) | -8,1772  | 66,55(17) | 5,6  | 68,6 | 1,8463(18) | 5,035(2)   |
| Cg9  | Cg18 | [2576] | 5,413(3) | -14,2406 | 63,73(17) | 23,4 | 70,8 | 1,7812(18) | 4,9672(18) |
| Cg10 | Cg2  | [2766] | 5,056(3) | -11,2381 | 68,2(3)   | 11,5 | 66,1 | 2,051(2)   | 4,954(2)   |
| Cg10 | Cg3  | [2676] | 5,598(3) | -20,8761 | 67,8(3)   | 20,1 | 76,2 | 1,338(2)   | 5,257(2)   |
| Cg10 | Cg4  | [2676] | 4,809(3) | -20,4682 | 67,1(3)   | 8,9  | 72,9 | 1,410(2)   | 4,751(3)   |
| Cg10 | Cg7  | [2766] | 5,523(3) | -11,1186 | 68,9(2)   | 23,6 | 68,9 | 1,988(2)   | 5,0609(19) |
| Cg10 | Cg8  | [2676] | 5,073(3) | -20,6762 | 67,4(2)   | 9,5  | 74,1 | 1,393(2)   | 5,0040(19) |
| Cg10 | Cg12 | [1655] | 5,734(3) | 13,7408  | 69,8(3)   | 36,7 | 73,6 | 1,616(2)   | 4,598(3)   |

|      |      |        |          |          |           |      |      |            |            |
|------|------|--------|----------|----------|-----------|------|------|------------|------------|
| Cg11 | Cg1  | [2766] | 5,226(3) | -11,0246 | 68,9(3)   | 13,2 | 71,7 | 1,644(2)   | 5,087(2)   |
| Cg11 | Cg2  | [2766] | 5,122(3) | -11,2381 | 67,5(3)   | 14,3 | 69,9 | 1,761(2)   | 4,963(2)   |
| Cg11 | Cg3  | [2676] | 5,321(3) | -20,8761 | 67,7(3)   | 7,6  | 65   | 2,249(2)   | 5,275(2)   |
| Cg11 | Cg4  | [2676] | 5,586(3) | -20,4682 | 67,0(3)   | 33,1 | 66,1 | 2,268(2)   | 4,679(3)   |
| Cg11 | Cg7  | [2766] | 5,029(3) | -11,1186 | 68,2(2)   | 1,9  | 70,1 | 1,712(2)   | 5,0260(19) |
| Cg11 | Cg8  | [2676] | 5,316(3) | -20,6762 | 67,4(2)   | 20,6 | 64,7 | 2,276(2)   | 4,9770(19) |
| Cg12 | Cg1  | [2666] | 5,050(3) | -4,3201  | 1,8(3)    | 47,6 | 45,9 | 3,517(3)   | 3,406(2)   |
| Cg12 | Cg2  | [2666] | 3,822(4) | -4,6736  | 2,9(3)    | 23,7 | 22,9 | 3,521(3)   | 3,498(3)   |
| Cg12 | Cg7  | [2666] | 4,309(3) | -4,4821  | 2,3(2)    | 36,7 | 35   | 3,529(3)   | 3,4543(19) |
| Cg12 | Cg10 | [1555] | 5,479(3) | 6,8166   | 69,8(3)   | 23,2 | 78,9 | 1,050(3)   | 5,037(2)   |
| Cg12 | Cg11 | [1555] | 4,918(4) | 6,0772   | 69,0(3)   | 9,6  | 77,2 | 1,090(3)   | 4,849(2)   |
| Cg12 | Cg16 | [1555] | 5,060(3) | 6,4443   | 69,4(2)   | 12,4 | 78,1 | 1,045(3)   | 4,9417(18) |
| Cg13 | Cg1  | [2666] | 3,874(4) | -4,3201  | 1,6(3)    | 28,4 | 27,2 | 3,445(3)   | 3,407(2)   |
| Cg13 | Cg1  | [2766] | 5,991(4) | -11,0246 | 1,6(3)    | 57,5 | 57   | 3,259(3)   | 3,222(2)   |
| Cg13 | Cg2  | [2666] | 3,989(4) | -4,6736  | 2,6(3)    | 29   | 31,4 | 3,406(3)   | 3,490(3)   |
| Cg13 | Cg7  | [2666] | 3,739(3) | -4,4821  | 2,0(2)    | 22,6 | 23,2 | 3,437(3)   | 3,4505(19) |
| Cg13 | Cg11 | [1555] | 5,225(4) | 6,0772   | 68,7(3)   | 21,8 | 72,1 | 1,602(3)   | 4,852(2)   |
| Cg13 | Cg16 | [1555] | 5,869(3) | 6,4443   | 69,1(2)   | 32,5 | 74,1 | 1,603(3)   | 4,9487(18) |
| Cg14 | Cg3  | [2676] | 4,855(3) | -20,8761 | 2,3(3)    | 43,8 | 45,8 | 3,382(2)   | 3,504(3)   |
| Cg14 | Cg4  | [2676] | 3,797(4) | -20,4682 | 1,0(3)    | 25,1 | 25,7 | 3,421(2)   | 3,438(3)   |
| Cg14 | Cg8  | [2676] | 4,186(3) | -20,6762 | 1,6(2)    | 33,9 | 35,2 | 3,421(2)   | 3,474(2)   |
| Cg14 | Cg10 | [1455] | 4,811(3) | 10,364   | 67,2(2)   | 17,1 | 76,5 | 1,123(2)   | 4,600(2)   |
| Cg14 | Cg16 | [1455] | 5,604(3) | 9,975    | 67,1(2)   | 26,6 | 78,6 | 1,111(2)   | 5,0105(18) |
| Cg15 | Cg3  | [2676] | 3,774(4) | -20,8761 | 3,4(3)    | 21,6 | 22,1 | 3,495(3)   | 3,508(3)   |
| Cg15 | Cg4  | [2676] | 4,120(4) | -20,4682 | 1,9(3)    | 34,3 | 32,4 | 3,477(3)   | 3,403(3)   |
| Cg15 | Cg8  | [2676] | 3,760(3) | -20,6762 | 2,6(2)    | 23,1 | 21,3 | 3,504(3)   | 3,459(2)   |
| Cg15 | Cg10 | [1455] | 4,766(3) | 10,364   | 66,1(3)   | 15,7 | 73,6 | 1,348(2)   | 4,588(2)   |
| Cg15 | Cg11 | [1455] | 5,560(4) | 9,5895   | 65,9(3)   | 14,8 | 75,9 | 1,359(2)   | 5,374(2)   |
| Cg15 | Cg16 | [1455] | 5,033(3) | 9,975    | 66,0(2)   | 8,1  | 74,1 | 1,379(2)   | 4,9825(18) |
| Cg16 | Cg1  | [2766] | 5,598(3) | -11,0246 | 69,3(2)   | 24,2 | 71,5 | 1,7740(18) | 5,105(2)   |
| Cg16 | Cg2  | [2766] | 4,937(3) | -11,2381 | 67,8(2)   | 1,7  | 67,3 | 1,9047(18) | 4,935(2)   |
| Cg16 | Cg3  | [2676] | 5,327(3) | -20,8761 | 67,7(2)   | 6,7  | 70,3 | 1,7949(18) | 5,291(2)   |
| Cg16 | Cg4  | [2676] | 5,070(3) | -20,4682 | 67,1(2)   | 20,7 | 68,7 | 1,8406(18) | 4,742(3)   |
| Cg16 | Cg7  | [2766] | 5,135(3) | -11,1186 | 68,58(17) | 12,1 | 68,9 | 1,8485(18) | 5,0206(19) |
| Cg16 | Cg8  | [2676] | 5,054(3) | -20,6762 | 67,39(17) | 7    | 68,7 | 1,8358(18) | 5,0167(19) |
| Cg16 | Cg12 | [1655] | 5,950(3) | 13,7408  | 69,4(2)   | 39,7 | 73,3 | 1,7118(18) | 4,576(3)   |
| Cg17 | Cg1  | [2666] | 4,332(3) | -4,3201  | 1,7(2)    | 38,1 | 36,5 | 3,481(2)   | 3,408(2)   |
| Cg17 | Cg2  | [2666] | 3,711(3) | -4,6736  | 2,8(2)    | 19,5 | 21   | 3,464(2)   | 3,497(3)   |
| Cg17 | Cg7  | [2666] | 3,845(3) | -4,4821  | 2,15(18)  | 26   | 25,1 | 3,483(2)   | 3,4550(19) |
| Cg17 | Cg10 | [1555] | 5,983(3) | 6,8166   | 69,6(2)   | 32,7 | 77   | 1,350(2)   | 5,037(2)   |
| Cg17 | Cg11 | [1555] | 4,923(3) | 6,0772   | 68,9(2)   | 10,1 | 74,1 | 1,347(2)   | 4,847(2)   |
| Cg17 | Cg16 | [1555] | 5,341(3) | 6,4443   | 69,25(17) | 22,3 | 75,6 | 1,325(2)   | 4,9410(18) |
| Cg18 | Cg3  | [2676] | 4,174(3) | -20,8761 | 2,8(2)    | 32,6 | 34,5 | 3,4407(19) | 3,517(3)   |
| Cg18 | Cg4  | [2676] | 3,770(3) | -20,4682 | 1,4(3)    | 24,4 | 23,7 | 3,4511(19) | 3,433(3)   |
| Cg18 | Cg8  | [2676] | 3,787(3) | -20,6762 | 2,03(18)  | 23,3 | 23,8 | 3,4644(19) | 3,478(2)   |

|      |      |        |          |        |           |      |      |            |            |
|------|------|--------|----------|--------|-----------|------|------|------------|------------|
| Cg18 | Cg10 | [1455] | 4,628(3) | 10,364 | 66,7(2)   | 7,8  | 74,5 | 1,2351(18) | 4,584(2)   |
| Cg18 | Cg11 | [1455] | 5,938(3) | 9,5895 | 66,5(2)   | 24,9 | 78,3 | 1,2012(18) | 5,387(2)   |
| Cg18 | Cg12 | [1555] | 5,984(3) | 7,0877 | 15,4(2)   | 56,2 | 61,9 | 2,8216(19) | 3,326(3)   |
| Cg18 | Cg16 | [1455] | 5,182(3) | 9,975  | 66,61(17) | 15,7 | 76,1 | 1,2443(18) | 4,9870(18) |

|        |             |
|--------|-------------|
| [1655] | 1+X,Y,Z     |
| [2666] | 1-X,1-Y,1-Z |
| [2766] | 2-X,1-Y,1-Z |
| [1555] | X,Y,Z       |
| [2676] | 1-X,2-Y,1-Z |
| [1455] | -1+X,Y,Z    |
| [1576] | -X,2-Y,1-Z  |
| [2766] | 2-X,1-Y,1-Z |
| [2676] | 1-X,2-Y,1-Z |
| [1655] | 1+X,Y,Z     |
| [2666] | 1-X,1-Y,1-Z |
| [1555] | X,Y,Z       |
| [1455] | -1+X,Y,Z    |

#### Analysis of X-H...Cg(Pi-Ring) Interactions (H..Cg < 3.0 Ang. - Gamma < 40.0 Deg)

- Cg(J) = Center of gravity of ring J (Plane number above)
- H-Perp = Perpendicular distance of H to ring plane J
- Gamma = Angle between Cg-H vector and ring J normal
- X-H..Cg = X-H-Cg angle (degrees)
- X..Cg = Distance of X to Cg (Angstrom)
- X-H, Pi = Angle of the X-H bond with the Pi-plane (i.e. ' Perpendicular = 90 degrees, Parallel = 0 degrees)

| X--H(I) | Cg(J) | [ARU(J)] | H..Cg | H-Perp | Gamma | X-H..Cg | X..Cg    | X-H,Pi |
|---------|-------|----------|-------|--------|-------|---------|----------|--------|
| C11-H11 | Cg16  | [2766]   | 2,92  | -2,77  | 18,59 | 139     | 3,694(6) | 67     |
| C22-H22 | Cg10  | [2676]   | 2,66  | 2,63   | 9,24  | 147     | 3,495(7) | 64     |
| C36-H36 | Cg3   | [1555]   | 2,67  | -2,63  | 9,67  | 152     | 3,538(7) | 64     |
| C36-H36 | Cg8   | [1555]   | 2,75  | -2,62  | 17,2  | 140     | 3,528(6) | 63     |
| C41-H41 | Cg1   | [1455]   | 2,74  | 2,63   | 16,44 | 131     | 3,444(6) | 58     |
| C41-H41 | Cg7   | [1455]   | 2,76  | 2,63   | 17,84 | 143     | 3,570(6) | 57     |
| C54-H54 | Cg12  | [1555]   | 2,69  | 2,67   | 6,46  | 154     | 3,567(7) | 67     |
| C54-H54 | Cg17  | [1555]   | 2,87  | 2,67   | 21,26 | 141     | 3,651(7) | 67     |
| C59-H59 | Cg15  | [1655]   | 2,62  | -2,57  | 10,99 | 148     | 3,458(6) | 60     |
| C59-H59 | Cg18  | [1655]   | 2,7   | -2,56  | 18,59 | 133     | 3,419(6) | 60     |
| C60-H60 | Cg14  | [1655]   | 2,91  | -2,9   | 5,06  | 131     | 3,614(6) | 46     |
| C72-H72 | Cg5   | [2666]   | 2,69  | -2,67  | 7,14  | 146     | 3,515(7) | 62     |
| C72-H72 | Cg9   | [2666]   | 2,99  | -2,67  | 26,84 | 141     | 3,771(6) | 63     |
| C85-H85 | Cg6   | [2576]   | 2,8   | 2,75   | 10,04 | 143     | 3,603(7) | 63     |

|        |             |
|--------|-------------|
| [2766] | 2-X,1-Y,1-Z |
| [2676] | 1-X,2-Y,1-Z |
| [1555] | X,Y,Z       |
| [1455] | -1+X,Y,Z    |
| [1555] | X,Y,Z       |
| [1655] | 1+X,Y,Z     |
| [2666] | 1-X,1-Y,1-Z |
| [2576] | -X,2-Y,1-Z  |

The Cg(l) refer to the Ring Centre-of-Gravity numbers given in ( ) in the Ring-Analysis above.

| Cg(l) | x         | y           | z          |
|-------|-----------|-------------|------------|
| Cg1   | 0,8430(3) | 0,56290(14) | 0,32998(8) |
| Cg2   | 0,8320(3) | 0,54548(16) | 0,24711(8) |
| Cg3   | 0,5367(3) | 0,93185(16) | 0,26387(8) |
| Cg4   | 0,5100(3) | 0,96707(16) | 0,18230(8) |
| Cg5   | 0,1458(2) | 0,74838(13) | 0,30889(8) |
| Cg6   | 0,2012(3) | 0,76205(15) | 0,22607(8) |
| Cg7   | 0,8376(2) | 0,55430(12) | 0,28852(6) |
| Cg8   | 0,5231(2) | 0,94937(12) | 0,22309(6) |
| Cg9   | 0,1736(2) | 0,75524(11) | 0,26753(6) |
| Cg10  | 0,8615(2) | 0,76078(12) | 0,79185(8) |
| Cg11  | 0,8075(3) | 0,74495(15) | 0,71215(8) |
| Cg12  | 0,4726(3) | 0,56840(16) | 0,76457(8) |
| Cg13  | 0,4933(3) | 0,52913(16) | 0,68308(8) |
| Cg14  | 0,1671(3) | 0,93473(14) | 0,84193(7) |
| Cg15  | 0,1626(3) | 0,95385(16) | 0,75840(8) |
| Cg16  | 0,8348(2) | 0,75263(11) | 0,75200(6) |
| Cg17  | 0,4831(2) | 0,54874(13) | 0,72383(6) |
| Cg18  | 0,1646(2) | 0,94423(12) | 0,80017(6) |

| Nr | Donor | --- H.... | Acceptor [ ARU ] | D - H | H...A | D...A    | D - H...A |
|----|-------|-----------|------------------|-------|-------|----------|-----------|
| 1  | O7    | --H7      | ..O8 [ 2676.01]  | 0.81  | 2.05  | 2.819(4) | 158       |
| 2  | O8    | --H8A     | ..O3 [ 2676.01]  | 0.92  | 1.90  | 2.754(5) | 154       |
| 3  | O15   | --H15     | ..O16 [ 2667.02] | 0.77  | 2.11  | 2.817(4) | 153       |
| 4  | O16   | --H16     | ..O11 [ 2667.02] | 0.84  | 2.00  | 2.800(5) | 159       |

Translation of ARU-Code to CIF and Equivalent Position Code

[ 2676.] = [ 2\_676] = 1-x,2-y,1-z  
 [ 1655.] = [ 1\_655] = 1+x,y,z  
 [ 2667.] = [ 2\_667] = 1-x,1-y,2-z  
 [ 1455.] = [ 1\_455] = -1+x,y,z

**Table S3.** Non-coordinative interactions in **2**.

|                      |      |     |      |     |      |     |      |     |      |     |      |     |
|----------------------|------|-----|------|-----|------|-----|------|-----|------|-----|------|-----|
| 6-Membered Ring (1)  | N1   | --> | C43  | --> | C44  | --> | C45  | --> | C46  | --> | C47  | --> |
| 6-Membered Ring (2)  | N2   | --> | C51  | --> | C50  | --> | C52  | --> | C53  | --> | C54  | --> |
| 6-Membered Ring (3)  | C5   | --> | C6   | --> | C7   | --> | C12  | --> | C13  | --> | C14  | --> |
| 6-Membered Ring (4)  | C7   | --> | C8   | --> | C9   | --> | C10  | --> | C11  | --> | C12  | --> |
| 6-Membered Ring (5)  | C19  | --> | C20  | --> | C21  | --> | C26  | --> | C27  | --> | C28  | --> |
| 6-Membered Ring (6)  | C21  | --> | C22  | --> | C23  | --> | C24  | --> | C25  | --> | C26  | --> |
| 6-Membered Ring (7)  | C33  | --> | C34  | --> | C35  | --> | C40  | --> | C41  | --> | C42  | --> |
| 6-Membered Ring (8)  | C35  | --> | C36  | --> | C37  | --> | C38  | --> | C39  | --> | C40  | --> |
| 6-Membered Ring (9)  | C43  | --> | C44  | --> | C48  | --> | C49  | --> | C50  | --> | C51  | --> |
| 6-Membered Ring (10) | C33A | --> | C34A | --> | C35A | --> | C40A | --> | C41A | --> | C42A | --> |
| 6-Membered Ring (11) | C35A | --> | C36A | --> | C37A | --> | C38A | --> | C39A | --> | C40A | --> |

**Analysis of Short Ring-Interactions with Cg-Cg Distances < 6.0 Ang., Alpha < 20.000 Deg. and Beta < 60.0 Deg.**

- Cg(I) = Plane number I (= ring number in () above)
- Alpha = Dihedral Angle between Planes I and J (Deg)
- Beta = Angle Cg(I)-->Cg(J) or Cg(I)-->Me vector and normal to plane I (Deg)
- Gamma = Angle Cg(I)-->Cg(J) vector and normal to plane J (Deg)
- Cg-Cg = Distance between ring Centroids (Ang.)
- CgI\_Perp = Perpendicular distance of Cg(I) on ring J (Ang.)
- CgJ\_Perp = Perpendicular distance of Cg(J) on ring I (Ang.)
- Slippage = Distance between Cg(I) and Perpendicular Projection of Cg(J) on Ring I (Ang.).

| Cg(I) | Cg(J) | [ARU(J)] | Cg-Cg      | Alpha    | Beta      | Gamma | CgI_Perp | CgJ_Perp   | Slippage   |
|-------|-------|----------|------------|----------|-----------|-------|----------|------------|------------|
| Cg1   | Cg1   | [3666]   | 3,556(2)   | -12,5275 | 0,00(17)  | 20,4  | 20,4     | 3,3329(14) | 3,3331(14) |
| Cg1   | Cg2   | [3666]   | 5,543(2)   | -12,7798 | 6,01(17)  | 50,4  | 56,1     | 3,0898(14) | 3,5313(14) |
| Cg1   | Cg8   | [2556]   | 4,750(3)   | 15,3989  | 36,1(2)   | 28,3  | 55,1     | 2,7181(14) | 4,184(2)   |
| Cg1   | Cg9   | [3666]   | 3,922(2)   | -12,5885 | 2,06(17)  | 31    | 32,8     | 3,2975(14) | 3,3607(15) |
| Cg1   | Cg11  | [2556]   | 4,585(9)   | 16,3707  | 31,9(8)   | 34,4  | 47,4     | 3,1048(14) | 3,784(8)   |
| Cg2   | Cg1   | [3666]   | 5,543(2)   | -12,5275 | 6,01(17)  | 56,1  | 50,4     | 3,5313(14) | 3,0899(14) |
| Cg2   | Cg4   | [4454]   | 5,183(2)   | -2,3495  | 83,34(16) | 30,1  | 53,7     | 3,0716(14) | 4,4834(14) |
| Cg2   | Cg7   | [2556]   | 4,218(2)   | 15,4047  | 32,2(2)   | 14,5  | 43,7     | 3,0480(14) | 4,083(2)   |
| Cg2   | Cg8   | [2556]   | 4,507(3)   | 15,3989  | 31,8(2)   | 24,8  | 46,8     | 3,0827(14) | 4,090(2)   |
| Cg2   | Cg10  | [2556]   | 4,836(7)   | 15,3594  | 32,6(7)   | 19,3  | 51,3     | 3,0251(14) | 4,563(8)   |
| Cg2   | Cg11  | [2556]   | 3,910(8)   | 16,3707  | 28,1(8)   | 18,5  | 34,1     | 3,2367(14) | 3,706(8)   |
| Cg3   | Cg5   | [1555]   | 5,906(2)   | 6,4425   | 20,70(17) | 53    | 46,4     | 4,0750(15) | 3,5558(14) |
| Cg3   | Cg7   | [2546]   | 3,558(3)   | 5,2891   | 5,6(2)    | 7,6   | 4,6      | 3,5468(14) | 3,527(2)   |
| Cg3   | Cg8   | [2546]   | 4,386(3)   | 5,4665   | 3,7(2)    | 40,5  | 36,8     | 3,5100(14) | 3,334(2)   |
| Cg3   | Cg10  | [2546]   | 3,629(9)   | 5,1798   | 6,1(7)    | 16    | 11,2     | 3,5594(14) | 3,489(8)   |
| Cg3   | Cg11  | [2546]   | 4,183(9)   | 6,5622   | 7,6(8)    | 38,6  | 31       | 3,5846(14) | 3,270(9)   |
| Cg4   | Cg1   | [2646]   | 5,8315(19) | -21,2245 | 83,48(17) | 44    | 80,5     | 0,9652(14) | 4,1928(14) |
| Cg4   | Cg2   | [4555]   | 5,183(2)   | 24,1422  | 83,34(16) | 53,7  | 30,1     | 4,4834(14) | 3,0717(14) |
| Cg4   | Cg7   | [2546]   | 4,299(2)   | 5,2891   | 5,9(2)    | 34,1  | 38,1     | 3,3832(15) | 3,561(2)   |
| Cg4   | Cg8   | [2546]   | 4,483(3)   | 5,4665   | 4,1(2)    | 41,2  | 40,8     | 3,3957(15) | 3,376(2)   |
| Cg4   | Cg9   | [4555]   | 5,732(2)   | 24,5118  | 83,31(17) | 54,2  | 39,6     | 4,4184(14) | 3,3512(15) |
| Cg4   | Cg10  | [2546]   | 3,792(8)   | 5,1798   | 6,5(7)    | 22,7  | 27,1     | 3,3754(15) | 3,499(8)   |
| Cg4   | Cg11  | [2546]   | 4,832(8)   | 6,5622   | 6,8(8)    | 46,3  | 42,5     | 3,5638(15) | 3,336(9)   |

|      |      |        |          |          |           |      |      |            |            |
|------|------|--------|----------|----------|-----------|------|------|------------|------------|
| Cg5  | Cg2  | [2546] | 5,102(2) | -15,2659 | 74,70(17) | 20   | 85,8 | 0,3750(14) | 4,7938(14) |
| Cg5  | Cg3  | [1555] | 5,906(2) | 9,0743   | 20,70(17) | 46,4 | 53   | 3,5559(14) | 4,0750(15) |
| Cg5  | Cg4  | [3657] | 5,766(2) | -11,5107 | 22,27(17) | 52,3 | 73,7 | 1,6149(14) | 3,5296(15) |
| Cg5  | Cg7  | [2556] | 4,939(3) | 15,4047  | 19,3(2)   | 39,4 | 58,6 | 2,5713(15) | 3,818(2)   |
| Cg5  | Cg8  | [2556] | 5,439(3) | 15,3989  | 19,8(2)   | 45,7 | 61,8 | 2,5689(15) | 3,802(2)   |
| Cg5  | Cg10 | [2556] | 4,197(9) | 15,3594  | 19,0(7)   | 33   | 52,1 | 2,5806(15) | 3,518(9)   |
| Cg6  | Cg2  | [2546] | 4,857(2) | -15,2659 | 73,92(17) | 10,5 | 79,8 | 0,8631(16) | 4,7757(14) |
| Cg6  | Cg4  | [3657] | 5,775(2) | -11,5107 | 22,82(17) | 51,9 | 74,5 | 1,5393(15) | 3,5632(15) |
| Cg6  | Cg7  | [2556] | 5,716(3) | 15,4047  | 19,4(2)   | 48,6 | 64,7 | 2,4403(15) | 3,781(2)   |
| Cg6  | Cg9  | [2546] | 5,385(2) | -16,1932 | 73,87(17) | 19,1 | 80,4 | 0,9008(16) | 5,0888(15) |
| Cg6  | Cg10 | [2556] | 5,162(8) | 15,3594  | 19,1(7)   | 47,8 | 61,9 | 2,4309(15) | 3,469(9)   |
| Cg7  | Cg2  | [2546] | 4,218(2) | -15,2659 | 32,2(2)   | 43,7 | 14,5 | 4,083(2)   | 3,0480(14) |
| Cg7  | Cg3  | [2556] | 3,558(3) | 0,913    | 5,6(2)    | 4,6  | 7,6  | 3,526(2)   | 3,5469(14) |
| Cg7  | Cg4  | [2556] | 4,299(2) | 0,456    | 5,9(2)    | 38,1 | 34,1 | 3,560(2)   | 3,3833(15) |
| Cg7  | Cg5  | [2546] | 4,939(3) | -0,8887  | 19,3(2)   | 58,6 | 39,4 | 3,818(2)   | 2,5713(15) |
| Cg8  | Cg1  | [2546] | 4,751(3) | -16,6945 | 36,1(2)   | 55,1 | 28,3 | 4,184(2)   | 2,7180(14) |
| Cg8  | Cg2  | [2546] | 4,507(3) | -15,2659 | 31,8(2)   | 46,8 | 24,8 | 4,090(2)   | 3,0827(14) |
| Cg8  | Cg3  | [2556] | 4,386(3) | 0,913    | 3,7(2)    | 36,8 | 40,5 | 3,334(2)   | 3,5100(14) |
| Cg8  | Cg4  | [2556] | 4,483(3) | 0,456    | 4,1(2)    | 40,8 | 41,2 | 3,376(2)   | 3,3958(15) |
| Cg9  | Cg1  | [3666] | 3,922(2) | -12,5275 | 2,06(17)  | 32,8 | 31   | 3,3608(15) | 3,2976(14) |
| Cg9  | Cg4  | [4454] | 5,732(2) | -2,3495  | 83,31(17) | 39,6 | 54,2 | 3,3511(15) | 4,4183(14) |
| Cg9  | Cg7  | [2556] | 5,284(2) | 15,4047  | 34,9(2)   | 36,8 | 64,5 | 2,2718(15) | 4,230(2)   |
| Cg9  | Cg8  | [2556] | 4,573(3) | 15,3989  | 34,6(2)   | 25,9 | 60,5 | 2,2532(15) | 4,114(2)   |
| Cg9  | Cg9  | [3666] | 5,448(2) | -12,5885 | 0,00(17)  | 52,9 | 52,9 | 3,2871(15) | 3,2870(15) |
| Cg9  | Cg10 | [2556] | 5,861(7) | 15,3594  | 35,2(7)   | 36,2 | 67,3 | 2,2601(15) | 4,729(8)   |
| Cg9  | Cg11 | [2556] | 3,940(8) | 16,3707  | 30,6(8)   | 19,4 | 48,9 | 2,5890(15) | 3,717(8)   |
| Cg10 | Cg2  | [2546] | 4,836(7) | -15,2659 | 32,6(7)   | 51,3 | 19,3 | 4,563(8)   | 3,0251(14) |
| Cg10 | Cg3  | [2556] | 3,630(9) | 0,913    | 6,1(7)    | 11,2 | 16   | 3,490(8)   | 3,5595(14) |
| Cg10 | Cg4  | [2556] | 3,792(8) | 0,456    | 6,5(7)    | 27,1 | 22,7 | 3,499(8)   | 3,3754(15) |
| Cg10 | Cg5  | [2546] | 4,196(9) | -0,8887  | 19,0(7)   | 52,1 | 33   | 3,517(9)   | 2,5806(15) |
| Cg11 | Cg1  | [2546] | 4,585(9) | -16,6945 | 31,9(8)   | 47,4 | 34,4 | 3,784(8)   | 3,1047(14) |
| Cg11 | Cg2  | [2546] | 3,910(8) | -15,2659 | 28,1(8)   | 34,1 | 18,5 | 3,707(8)   | 3,2367(14) |
| Cg11 | Cg3  | [2556] | 4,183(9) | 0,913    | 7,6(8)    | 31   | 38,6 | 3,270(9)   | 3,5847(14) |
| Cg11 | Cg4  | [2556] | 4,831(8) | 0,456    | 6,8(8)    | 42,5 | 46,3 | 3,336(9)   | 3,5638(15) |
| Cg11 | Cg9  | [2546] | 3,940(8) | -16,1932 | 30,6(8)   | 48,9 | 19,4 | 3,718(8)   | 2,5891(15) |

|        |                     |
|--------|---------------------|
| [3666] | 1-X,1-Y,1-Z         |
| [2556] | 1/2-X,1/2+Y,3/2-Z   |
| [4454] | -1/2+X,1/2-Y,-1/2+Z |
| [1555] | X,Y,Z               |
| [2546] | 1/2-X,-1/2+Y,3/2-Z  |
| [2646] | 3/2-X,-1/2+Y,3/2-Z  |
| [4555] | 1/2+X,1/2-Y,1/2+Z   |
| [3657] | 1-X,-Y,2-Z          |



### Analysis of X-H...Cg(Pi-Ring) Interactions (H..Cg < 3.0 Ang. - Gamma < 40.0 Deg)

- Cg(J) = Center of gravity of ring J (Plane number above)
- H-Perp = Perpendicular distance of H to ring plane J
- Gamma = Angle between Cg-H vector and ring J normal
- X-H..Cg = X-H-Cg angle (degrees)
- X..Cg = Distance of X to Cg (Angstrom)
- X-H, Pi = Angle of the X-H bond with the Pi-plane (i.e. ' Perpendicular = 90 degrees, Parallel = 0 degrees)

| X--H(I)   | Cg(J) | [ARU(J)] | H..Cg | H-Perp | Gamma | X-H..Cg | X..Cg     | X-H,Pi |
|-----------|-------|----------|-------|--------|-------|---------|-----------|--------|
| C39-H39   | Cg9   | [2546]   | 2,81  | 2,81   | 1,16  | 124     | 3,427(5)  | 33     |
| C52-H52   | Cg6   | [2556]   | 2,6   | -2,55  | 10,98 | 159     | 3,505(4)  | 72     |
| C37A-H37A | Cg9   | [2546]   | 2,68  | 2,55   | 17,88 | 102     | 3,03(2)   | 29     |
| C42A-H42A | Cg5   | [2546]   | 2,88  | 2,86   | 6,14  | 105     | 3,255(17) | 15     |

|        |                    |
|--------|--------------------|
| [2546] | 1/2-X,-1/2+Y,3/2-Z |
| [2556] | 1/2-X,1/2+Y,3/2-Z  |

### Analysis of Y-X...Cg(Pi-Ring) Interactions (X..Cg < 4.0 Ang. - Gamma < 30.0 Deg)

| Y--X(I) | Cg(J) | [ARU(J)] | X..Cg    | X-Perp | Gamma | Y-X..Cg  | Y..Cg    | Y-X,Pi |
|---------|-------|----------|----------|--------|-------|----------|----------|--------|
| C29-F8  | Cg4   | [4454]   | 3,205(3) | 3,197  | 4,09  | 139,1(2) | 4,309(4) | 47,45  |

|        |                     |
|--------|---------------------|
| [4454] | -1/2+X,1/2-Y,-1/2+Z |
|--------|---------------------|

The Cg(I) refer to the Ring Centre-of-Gravity numbers given in ( ) in the Ring-Analysis above.

| Cg(I) | x            | y            | z          |
|-------|--------------|--------------|------------|
| Cg1   | 0,54807(8)   | 0,51863(12)  | 0,57333(6) |
| Cg2   | 0,31908(8)   | 0,61868(12)  | 0,61067(6) |
| Cg3   | 0,52212(8)   | -0,01030(12) | 0,84136(6) |
| Cg4   | 0,60243(8)   | -0,12723(12) | 0,91667(6) |
| Cg5   | 0,39938(8)   | 0,42783(12)  | 0,89698(6) |
| Cg6   | 0,27842(10)  | 0,49468(12)  | 0,93401(7) |
| Cg7   | 0,08508(13)  | 0,25178(17)  | 0,72568(8) |
| Cg8   | -0,04602(13) | 0,17590(18)  | 0,74540(9) |
| Cg9   | 0,43470(10)  | 0,65193(12)  | 0,56290(6) |
| Cg10  | 0,0560(5)    | 0,2113(7)    | 0,6932(3)  |
| Cg11  | -0,0116(5)   | 0,2294(8)    | 0,7747(3)  |

**Table S4.** Non-coordinative interactions in **2a**.

|                     |     |     |     |     |     |     |     |     |     |     |     |     |
|---------------------|-----|-----|-----|-----|-----|-----|-----|-----|-----|-----|-----|-----|
| 6-Membered Ring (1) | N1  | --> | C43 | --> | C44 | --> | C45 | --> | C46 | --> | C47 | --> |
| 6-Membered Ring (2) | N2  | --> | C48 | --> | C49 | --> | C50 | --> | C51 | --> | C52 | --> |
| 6-Membered Ring (3) | C5  | --> | C6  | --> | C7  | --> | C12 | --> | C13 | --> | C14 | --> |
| 6-Membered Ring (4) | C7  | --> | C8  | --> | C9  | --> | C10 | --> | C11 | --> | C12 | --> |
| 6-Membered Ring (5) | C19 | --> | C20 | --> | C21 | --> | C26 | --> | C27 | --> | C28 | --> |
| 6-Membered Ring (6) | C21 | --> | C22 | --> | C23 | --> | C24 | --> | C25 | --> | C26 | --> |
| 6-Membered Ring (7) | C33 | --> | C34 | --> | C35 | --> | C40 | --> | C41 | --> | C42 | --> |
| 6-Membered Ring (8) | C35 | --> | C36 | --> | C37 | --> | C38 | --> | C39 | --> | C40 | --> |
| 6-Membered Ring (9) | C46 | --> | C47 | --> | C48 | --> | C49 | --> | C54 | --> | C53 | --> |

**Analysis of Short Ring-Interactions with Cg-Cg Distances < 6.0 Ang., Alpha < 20.000 Deg. and Beta < 60.0 Deg.**

- Cg(I) = Plane number I (= ring number in () above)
- Alpha = Dihedral Angle between Planes I and J (Deg)
- Beta = Angle Cg(I)-->Cg(J) or Cg(I)-->Me vector and normal to plane I (Deg)
- Gamma = Angle Cg(I)-->Cg(J) vector and normal to plane J (Deg)
- Cg-Cg = Distance between ring Centroids (Ang.)
- CgI\_Perp = Perpendicular distance of Cg(I) on ring J (Ang.)
- CgJ\_Perp = Perpendicular distance of Cg(J) on ring I (Ang.)
- Slippage = Distance between Cg(I) and Perpendicular Projection of Cg(J) on Ring I (Ang).

| Cg(I) | Cg(J) | [ARU(J)] | Cg-Cg      | Alpha    | Beta      | Gamma | CgI_Perp | CgJ_Perp   | Slippage   |
|-------|-------|----------|------------|----------|-----------|-------|----------|------------|------------|
| Cg1   | Cg2   | [2767]   | 5,4804(19) | -4,29    | 7,00(15)  | 57,8  | 50,8     | 3,4601(13) | 2,9220(13) |
| Cg1   | Cg5   | [1655]   | 4,553(2)   | 26,3104  | 52,85(16) | 43,9  | 11,6     | 4,4597(14) | 3,2807(13) |
| Cg1   | Cg6   | [1655]   | 5,473(2)   | 26,6446  | 52,26(18) | 45,5  | 34,4     | 4,5149(14) | 3,8346(15) |
| Cg1   | Cg6   | [2677]   | 4,915(2)   | -23,5413 | 52,26(18) | 26    | 73,3     | 1,4116(14) | 4,4170(15) |
| Cg2   | Cg1   | [2767]   | 5,4804(19) | -6,1     | 7,00(15)  | 50,8  | 57,8     | 2,9220(13) | 3,4601(13) |
| Cg2   | Cg2   | [2767]   | 3,4426(18) | -4,29    | 0,00(15)  | 20,1  | 20,1     | 3,2333(13) | 3,2334(13) |
| Cg2   | Cg5   | [2677]   | 4,7660(18) | -23,143  | 51,65(16) | 11,7  | 48,7     | 3,1427(14) | 4,6662(13) |
| Cg2   | Cg6   | [2677]   | 4,6863(19) | -23,5413 | 51,31(17) | 19,9  | 47,7     | 3,1543(14) | 4,4057(15) |
| Cg2   | Cg9   | [2767]   | 3,8415(18) | -4,9186  | 2,38(15)  | 31,8  | 33,9     | 3,1902(13) | 3,2658(13) |
| Cg3   | Cg3   | [2766]   | 3,9872(18) | -12,4365 | 0,00(15)  | 34,4  | 34,4     | 3,2894(13) | 3,2894(13) |
| Cg3   | Cg4   | [2766]   | 4,973(2)   | -12,2194 | 1,22(16)  | 48,7  | 49,1     | 3,2550(13) | 3,2830(15) |
| Cg3   | Cg7   | [1555]   | 5,4100(19) | 4,8695   | 59,91(16) | 21,5  | 39,3     | 4,1850(13) | 5,0340(14) |
| Cg3   | Cg7   | [1655]   | 4,7061(19) | -0,8739  | 59,91(16) | 11,8  | 70,7     | 1,5584(13) | 4,6073(14) |
| Cg3   | Cg8   | [1555]   | 5,510(2)   | 4,5937   | 59,87(17) | 30,5  | 40,1     | 4,2158(13) | 4,7496(17) |
| Cg3   | Cg8   | [1655]   | 5,379(2)   | -1,1496  | 59,87(17) | 24,6  | 73,5     | 1,5276(13) | 4,8917(17) |
| Cg4   | Cg3   | [2766]   | 4,973(2)   | -12,4365 | 1,22(16)  | 49,1  | 48,7     | 3,2830(15) | 3,2550(13) |
| Cg4   | Cg7   | [1555]   | 5,919(2)   | 4,8695   | 58,86(17) | 30,9  | 52,2     | 3,6278(15) | 5,0809(14) |
| Cg4   | Cg7   | [1655]   | 5,383(2)   | -0,8739  | 58,86(17) | 31,7  | 66,9     | 2,1156(15) | 4,5783(14) |
| Cg4   | Cg8   | [1555]   | 4,957(2)   | 4,5937   | 58,85(18) | 15,7  | 44,3     | 3,5504(15) | 4,7720(17) |
| Cg4   | Cg8   | [1655]   | 4,921(2)   | -1,1496  | 58,85(18) | 6,7   | 63,5     | 2,1929(15) | 4,8873(17) |
| Cg5   | Cg1   | [1455]   | 4,553(2)   | 10,3432  | 52,85(16) | 11,6  | 43,9     | 3,2806(13) | 4,4596(14) |
| Cg5   | Cg2   | [2677]   | 4,7660(18) | -16,8019 | 51,65(16) | 48,7  | 11,7     | 4,6662(13) | 3,1427(14) |
| Cg5   | Cg5   | [2677]   | 4,497(2)   | -23,143  | 0,00(17)  | 40,4  | 40,4     | 3,4264(15) | 3,4264(15) |
| Cg5   | Cg6   | [2577]   | 4,989(2)   | -17,0639 | 1,66(18)  | 51,1  | 52       | 3,0687(15) | 3,1315(17) |

|     |     |        |            |          |           |      |      |            |            |
|-----|-----|--------|------------|----------|-----------|------|------|------------|------------|
| Cg5 | Cg6 | [2677] | 4,735(2)   | -23,5413 | 1,66(18)  | 43   | 43,9 | 3,4087(15) | 3,4624(17) |
| Cg5 | Cg9 | [1455] | 4,994(2)   | 9,328    | 51,81(16) | 22,5 | 47,3 | 3,3852(13) | 4,6151(15) |
| Cg6 | Cg1 | [1455] | 5,473(2)   | 10,3432  | 52,26(18) | 34,4 | 45,5 | 3,8346(15) | 4,5148(14) |
| Cg6 | Cg2 | [2677] | 4,6863(19) | -16,8019 | 51,31(17) | 47,7 | 19,9 | 4,4057(15) | 3,1543(14) |
| Cg6 | Cg5 | [2577] | 4,989(2)   | -16,5491 | 1,66(18)  | 52   | 51,1 | 3,1316(17) | 3,0688(15) |
| Cg6 | Cg5 | [2677] | 4,735(2)   | -23,143  | 1,66(18)  | 43,9 | 43   | 3,4623(17) | 3,4086(15) |
| Cg6 | Cg6 | [2577] | 4,623(3)   | -17,0639 | 0,00(19)  | 47,8 | 47,8 | 3,1034(17) | 3,1034(17) |
| Cg6 | Cg9 | [1455] | 4,763(2)   | 9,328    | 51,39(17) | 14,9 | 38,1 | 3,7461(15) | 4,6031(15) |
| Cg7 | Cg3 | [1555] | 5,4100(19) | 15,7258  | 59,91(16) | 39,3 | 21,5 | 5,0339(14) | 4,1850(13) |
| Cg7 | Cg3 | [2766] | 4,5491(19) | -12,4365 | 59,91(16) | 9,6  | 67,5 | 1,7446(14) | 4,4851(13) |
| Cg7 | Cg4 | [1555] | 5,919(2)   | 15,4819  | 58,86(17) | 52,2 | 30,9 | 5,0809(14) | 3,6278(15) |
| Cg7 | Cg4 | [2766] | 5,452(2)   | -12,2194 | 58,86(17) | 22,4 | 70,5 | 1,8184(14) | 5,0423(15) |
| Cg8 | Cg3 | [1555] | 5,510(2)   | 15,7258  | 59,87(17) | 40,1 | 30,5 | 4,7496(17) | 4,2157(13) |
| Cg8 | Cg3 | [2766] | 4,911(2)   | -12,4365 | 59,87(17) | 23,3 | 72,7 | 1,4602(17) | 4,5106(13) |
| Cg8 | Cg4 | [1555] | 4,957(2)   | 15,4819  | 58,85(18) | 44,3 | 15,7 | 4,7720(17) | 3,5504(15) |
| Cg8 | Cg8 | [2676] | 5,274(2)   | -8,0317  | 0,00(18)  | 49,3 | 49,3 | 3,4379(16) | 3,4380(16) |
| Cg9 | Cg2 | [2767] | 3,8416(18) | -4,29    | 2,38(15)  | 33,9 | 31,8 | 3,2658(13) | 3,1903(13) |
| Cg9 | Cg5 | [1655] | 4,994(2)   | 26,3104  | 51,81(16) | 47,3 | 22,5 | 4,6151(15) | 3,3853(13) |
| Cg9 | Cg5 | [2677] | 5,380(2)   | -23,143  | 51,81(16) | 28,7 | 74,4 | 1,4476(15) | 4,7183(13) |
| Cg9 | Cg6 | [1655] | 4,763(2)   | 26,6446  | 51,39(17) | 38,1 | 14,9 | 4,6031(15) | 3,7461(15) |
| Cg9 | Cg6 | [2677] | 4,661(2)   | -23,5413 | 51,39(17) | 20,8 | 71,2 | 1,4997(15) | 4,3574(15) |
| Cg9 | Cg9 | [2767] | 5,413(2)   | -4,9186  | 0,00(14)  | 54,1 | 54,1 | 3,1715(13) | 3,1715(13) |

|        |             |
|--------|-------------|
| [2767] | 2-X,1-Y,2-Z |
| [1655] | 1+X,Y,Z     |
| [2677] | 1-X,2-Y,2-Z |
| [2766] | 2-X,1-Y,1-Z |
| [1555] | X,Y,Z       |
| [1455] | -1+X,Y,Z    |
| [2577] | -X,2-Y,2-Z  |
| [2676] | 1-X,2-Y,1-Z |

#### Analysis of X-H...Cg(Pi-Ring) Interactions (H..Cg < 3.0 Ang. - Gamma < 40.0 Deg)

- Cg(J) = Center of gravity of ring J (Plane number above)
- H-Perp = Perpendicular distance of H to ring plane J
- Gamma = Angle between Cg-H vector and ring J normal
- X-H..Cg = X-H-Cg angle (degrees)
- X..Cg = Distance of X to Cg (Angstrom)
- X-H, Pi = Angle of the X-H bond with the Pi-plane (i.e. ' Perpendicular = 90 degrees, Parallel = 0 degrees)

| X--H(I) | Cg(J) | [ARU(J)] | H..Cg | H-Perp | Gamma | X-H..Cg | X..Cg    | X-H,Pi |
|---------|-------|----------|-------|--------|-------|---------|----------|--------|
| C13-H13 | Cg7   | [2766]   | 2,58  | -2,52  | 12,3  | 135     | 3,326(4) | 57     |
| C14-H14 | Cg8   | [2766]   | 2,99  | -2,98  | 3,16  | 134     | 3,706(3) | 41     |
| C25-H25 | Cg9   | [2677]   | 2,57  | 2,56   | 4,51  | 143     | 3,377(4) | 50     |

|         |     |        |     |      |      |     |          |    |
|---------|-----|--------|-----|------|------|-----|----------|----|
| C41-H41 | Cg3 | [1455] | 2,6 | 2,58 | 7,18 | 144 | 3,421(4) | 60 |
|---------|-----|--------|-----|------|------|-----|----------|----|

|        |             |
|--------|-------------|
| [2766] | 2-X,1-Y,1-Z |
| [2677] | 1-X,2-Y,2-Z |
| [1455] | -1+X,Y,Z    |

**Analysis of Y-X...Cg(Pi-Ring) Interactions (X..Cg < 4.0 Ang. - Gamma < 30.0 Deg)**

| Y--X(I) | Cg(J) | [ARU(J)] | X..Cg     | X-Perp | Gamma | Y-X..Cg   | Y..Cg   | Y-X,Pi |
|---------|-------|----------|-----------|--------|-------|-----------|---------|--------|
| C29-F8  | Cg1   | [1455]   | 3,344(17) | -3,322 | 6,47  | 117,5(13) | 4,12(2) | 20,99  |

The Cg(I) refer to the Ring Centre-of-Gravity numbers given in ( ) in the Ring-Analysis above.

| Cg(I) | x           | y           | z          |
|-------|-------------|-------------|------------|
| Cg1   | 1,21165(15) | 0,69882(11) | 0,85781(7) |
| Cg2   | 0,89038(15) | 0,63252(10) | 0,98796(6) |
| Cg3   | 1,11037(12) | 0,59455(11) | 0,53152(6) |
| Cg4   | 1,07437(15) | 0,73625(12) | 0,44987(6) |
| Cg5   | 0,32493(16) | 0,98707(11) | 0,94373(6) |
| Cg6   | 0,20030(18) | 0,98532(12) | 1,05123(7) |
| Cg7   | 0,52608(14) | 0,67630(12) | 0,58244(6) |
| Cg8   | 0,54367(16) | 0,78335(13) | 0,48605(7) |
| Cg9   | 1,12713(17) | 0,66110(10) | 0,96519(7) |

**Table S5: Non-coordinative interactions in 3.**

|                       |     |     |     |     |     |     |     |     |     |     |     |     |     |     |     |     |     |     |     |     |
|-----------------------|-----|-----|-----|-----|-----|-----|-----|-----|-----|-----|-----|-----|-----|-----|-----|-----|-----|-----|-----|-----|
| 6-Membered Ring (1)   | N1  | --> | C43 | --> | C44 | --> | C45 | --> | C46 | --> | C47 | --> |     |     |     |     |     |     |     |     |
| 6-Membered Ring (2)   | N2  | --> | C48 | --> | C49 | --> | C50 | --> | C51 | --> | C52 | --> |     |     |     |     |     |     |     |     |
| 6-Membered Ring (3)   | C5  | --> | C6  | --> | C7  | --> | C12 | --> | C13 | --> | C14 | --> |     |     |     |     |     |     |     |     |
| 6-Membered Ring (4)   | C7  | --> | C8  | --> | C9  | --> | C10 | --> | C11 | --> | C12 | --> |     |     |     |     |     |     |     |     |
| 6-Membered Ring (5)   | C19 | --> | C20 | --> | C21 | --> | C26 | --> | C27 | --> | C28 | --> |     |     |     |     |     |     |     |     |
| 6-Membered Ring (6)   | C21 | --> | C22 | --> | C23 | --> | C24 | --> | C25 | --> | C26 | --> |     |     |     |     |     |     |     |     |
| 6-Membered Ring (7)   | C33 | --> | C34 | --> | C35 | --> | C40 | --> | C41 | --> | C42 | --> |     |     |     |     |     |     |     |     |
| 6-Membered Ring (8)   | C35 | --> | C36 | --> | C37 | --> | C38 | --> | C39 | --> | C40 | --> |     |     |     |     |     |     |     |     |
| 10-Membered Ring (9)  | C5  | --> | C6  | --> | C7  | --> | C8  | --> | C9  | --> | C10 | --> | C11 | --> | C12 | --> | C13 | --> | C14 | --> |
| 10-Membered Ring (10) | C19 | --> | C20 | --> | C21 | --> | C22 | --> | C23 | --> | C24 | --> | C25 | --> | C26 | --> | C27 | --> | C28 | --> |
| 10-Membered Ring (11) | C33 | --> | C34 | --> | C35 | --> | C36 | --> | C37 | --> | C38 | --> | C39 | --> | C40 | --> | C41 | --> | C42 | --> |

**Analysis of Short Ring-Interactions with Cg-Cg Distances < 6.0 Ang., Alpha < 20.000 Deg. and Beta < 60.0 Deg.**

- Cg(I) = Plane number I (= ring number in () above)
- Alpha = Dihedral Angle between Planes I and J (Deg)
- Beta = Angle Cg(I)-->Cg(J) or Cg(I)-->Me vector and normal to plane I (Deg)
- Gamma = Angle Cg(I)-->Cg(J) vector and normal to plane J (Deg)
- Cg-Cg = Distance between ring Centroids (Ang.)
- CgI\_Perp = Perpendicular distance of Cg(I) on ring J (Ang.)
- CgJ\_Perp = Perpendicular distance of Cg(J) on ring I (Ang.)
- Slippage = Distance between Cg(I) and Perpendicular Projection of Cg(J) on Ring I (Ang).

| Cg(I) | Cg(J) | [ARU(J)] | Cg-Cg      | Alpha    | Beta      | Gamma | CgI_Perp | CgJ_Perp   | Slippage   |
|-------|-------|----------|------------|----------|-----------|-------|----------|------------|------------|
| Cg1   | Cg1   | [3565]   | 5,0674(14) | -11,2894 | 0,02(12)  | 47,9  | 47,9     | 3,3958(10) | 3,3958(10) |
| Cg1   | Cg2   | [3565]   | 3,8380(14) | -10,8471 | 7,23(12)  | 25,5  | 20,6     | 3,5933(10) | 3,4653(10) |
| Cg1   | Cg6   | [4554]   | 5,8745(15) | -1,6068  | 37,93(12) | 44,2  | 58,3     | 3,0905(10) | 4,2145(10) |
| Cg1   | Cg10  | [4554]   | 5,8364(13) | -1,5165  | 39,50(10) | 35,2  | 58,6     | 3,0375(10) | 4,7676(7)  |
| Cg2   | Cg1   | [3565]   | 3,8380(14) | -11,2894 | 7,23(12)  | 20,6  | 25,5     | 3,4653(10) | 3,5933(10) |
| Cg2   | Cg5   | [4554]   | 5,8450(13) | -1,4924  | 34,31(11) | 30,3  | 61,9     | 2,7508(9)  | 5,0486(9)  |
| Cg2   | Cg6   | [4554]   | 4,1728(14) | -1,6068  | 31,02(11) | 13,3  | 44,3     | 2,9852(10) | 4,0605(10) |
| Cg2   | Cg10  | [4554]   | 4,9325(12) | -1,5165  | 32,61(9)  | 22,4  | 53,9     | 2,9080(10) | 4,5594(7)  |
| Cg3   | Cg2   | [2555]   | 5,9588(13) | 15,724   | 67,46(11) | 53,7  | 66,1     | 2,4115(9)  | 3,5305(9)  |
| Cg3   | Cg2   | [3565]   | 5,2500(13) | -10,8471 | 79,34(11) | 28,9  | 73       | 1,5308(9)  | 4,5952(9)  |
| Cg3   | Cg5   | [2555]   | 4,5181(13) | 10,7451  | 45,31(10) | 44,2  | 17,2     | 4,3151(9)  | 3,2410(9)  |
| Cg3   | Cg6   | [2555]   | 4,7906(13) | 11,3291  | 48,50(10) | 23,2  | 27,3     | 4,2579(9)  | 4,4022(9)  |
| Cg3   | Cg8   | [3666]   | 5,2896(13) | -12,0114 | 68,18(10) | 26,5  | 88,4     | 0,1471(8)  | 4,7346(9)  |
| Cg3   | Cg10  | [2555]   | 4,4982(11) | 11,0848  | 46,96(8)  | 31,8  | 16,1     | 4,3222(9)  | 3,8250(7)  |
| Cg4   | Cg2   | [3565]   | 5,6459(14) | -10,8471 | 79,33(11) | 35,4  | 69,6     | 1,9679(9)  | 4,6021(9)  |
| Cg4   | Cg5   | [2555]   | 5,3568(13) | 10,7451  | 45,39(10) | 52,3  | 44,3     | 3,8367(9)  | 3,2761(9)  |
| Cg4   | Cg6   | [2555]   | 4,8741(13) | 11,3291  | 48,56(11) | 25,2  | 38,9     | 3,7939(9)  | 4,4101(9)  |
| Cg4   | Cg10  | [2555]   | 4,9773(12) | 11,0848  | 47,03(9)  | 39,4  | 39,3     | 3,8515(9)  | 3,8465(7)  |
| Cg5   | Cg3   | [2545]   | 4,5181(13) | -3,5089  | 45,31(10) | 17,2  | 44,2     | 3,2410(9)  | 4,3151(9)  |
| Cg5   | Cg4   | [2545]   | 5,3568(13) | -3,391   | 45,39(10) | 44,3  | 52,3     | 3,2761(9)  | 3,8367(9)  |
| Cg5   | Cg4   | [2645]   | 5,9875(13) | -8,5848  | 45,39(10) | 53,1  | 71,3     | 1,9177(9)  | 3,5909(9)  |
| Cg5   | Cg7   | [1555]   | 5,3740(13) | 8,4857   | 73,30(10) | 21,2  | 75,6     | 1,3340(9)  | 5,0112(9)  |
| Cg5   | Cg8   | [1555]   | 4,8724(13) | 8,9142   | 71,24(10) | 6     | 72,3     | 1,4799(9)  | 4,8454(9)  |

|      |      |        |            |          |           |      |      |            |            |
|------|------|--------|------------|----------|-----------|------|------|------------|------------|
| Cg5  | Cg9  | [2545] | 4,8014(12) | -3,4625  | 45,36(9)  | 31,9 | 47,4 | 3,2468(9)  | 4,0756(7)  |
| Cg5  | Cg11 | [1555] | 4,9794(12) | 8,6726   | 72,31(9)  | 8,4  | 73,9 | 1,3818(9)  | 4,9261(7)  |
| Cg6  | Cg1  | [4555] | 5,8745(15) | -0,2313  | 37,93(12) | 58,3 | 44,2 | 4,2146(10) | 3,0905(10) |
| Cg6  | Cg2  | [4555] | 4,1728(14) | -1,0871  | 31,02(11) | 44,3 | 13,3 | 4,0605(10) | 2,9852(10) |
| Cg6  | Cg3  | [2545] | 4,7906(13) | -3,5089  | 48,50(10) | 27,3 | 23,2 | 4,4022(9)  | 4,2579(9)  |
| Cg6  | Cg4  | [2545] | 4,8740(13) | -3,391   | 48,56(11) | 38,9 | 25,2 | 4,4101(9)  | 3,7939(9)  |
| Cg6  | Cg8  | [1555] | 5,2699(13) | 8,9142   | 72,12(11) | 22,6 | 87   | 0,2715(10) | 4,8653(9)  |
| Cg6  | Cg9  | [2545] | 4,6741(12) | -3,4625  | 48,54(9)  | 30,5 | 19,9 | 4,3953(9)  | 4,0257(7)  |
| Cg6  | Cg11 | [1555] | 5,7411(12) | 8,6726   | 73,13(9)  | 29,1 | 86,5 | 0,3507(10) | 5,0150(7)  |
| Cg7  | Cg4  | [2645] | 4,7850(13) | -8,5848  | 81,72(10) | 8,4  | 87,2 | 0,2332(8)  | 4,7340(9)  |
| Cg7  | Cg7  | [3666] | 3,6842(13) | -11,7406 | 0,00(10)  | 27,9 | 27,9 | 3,2548(9)  | 3,2548(9)  |
| Cg7  | Cg8  | [3666] | 5,2516(13) | -12,0114 | 2,85(10)  | 51,2 | 53,3 | 3,1360(9)  | 3,2934(9)  |
| Cg7  | Cg11 | [3666] | 4,3700(12) | -11,8957 | 1,39(8)   | 41,4 | 42,5 | 3,2197(9)  | 3,2774(7)  |
| Cg8  | Cg4  | [2645] | 5,0108(13) | -8,5848  | 78,87(10) | 18,7 | 68,4 | 1,8475(9)  | 4,7456(9)  |
| Cg8  | Cg7  | [3666] | 5,2515(13) | -11,7406 | 2,85(10)  | 53,3 | 51,2 | 3,2934(9)  | 3,1359(9)  |
| Cg9  | Cg2  | [2555] | 5,9953(12) | 15,724   | 67,06(9)  | 53,9 | 77,5 | 1,2977(7)  | 3,5295(9)  |
| Cg9  | Cg2  | [3565] | 5,3107(12) | -10,8471 | 79,35(9)  | 30,2 | 70,8 | 1,7486(7)  | 4,5886(9)  |
| Cg9  | Cg5  | [2555] | 4,8013(12) | 10,7451  | 45,36(9)  | 47,4 | 31,9 | 4,0756(7)  | 3,2468(9)  |
| Cg9  | Cg6  | [2555] | 4,6740(12) | 11,3291  | 48,54(9)  | 19,9 | 30,5 | 4,0257(7)  | 4,3952(9)  |
| Cg9  | Cg8  | [3666] | 5,6557(12) | -12,0114 | 68,28(9)  | 33,2 | 89,5 | 0,0510(7)  | 4,7311(9)  |
| Cg9  | Cg10 | [2555] | 4,5825(10) | 11,0848  | 47,00(6)  | 33,4 | 26,9 | 4,0866(7)  | 3,8244(7)  |
| Cg10 | Cg1  | [4555] | 5,8364(13) | -0,2313  | 39,50(10) | 58,6 | 35,2 | 4,7675(7)  | 3,0375(10) |
| Cg10 | Cg2  | [4555] | 4,9325(12) | -1,0871  | 32,61(9)  | 53,9 | 22,4 | 4,5594(7)  | 2,9080(10) |
| Cg10 | Cg3  | [2545] | 4,4981(11) | -3,5089  | 46,96(8)  | 16,1 | 31,8 | 3,8249(7)  | 4,3222(9)  |
| Cg10 | Cg4  | [2545] | 4,9772(12) | -3,391   | 47,03(9)  | 39,3 | 39,4 | 3,8464(7)  | 3,8515(9)  |
| Cg10 | Cg7  | [1555] | 5,7851(12) | 8,4857   | 73,70(9)  | 29   | 85,3 | 0,4765(7)  | 5,0600(9)  |
| Cg10 | Cg8  | [1555] | 4,9203(12) | 8,9142   | 71,70(9)  | 11,4 | 83   | 0,6026(7)  | 4,8230(9)  |
| Cg10 | Cg9  | [2545] | 4,5825(10) | -3,4625  | 47,00(6)  | 26,9 | 33,4 | 3,8244(7)  | 4,0867(7)  |
| Cg10 | Cg11 | [1555] | 5,2276(10) | 8,6726   | 72,73(6)  | 19,1 | 84,4 | 0,5141(7)  | 4,9394(7)  |
| Cg11 | Cg4  | [2645] | 4,7407(12) | -8,5848  | 80,32(9)  | 5,5  | 77,3 | 1,0386(7)  | 4,7186(9)  |
| Cg11 | Cg7  | [3666] | 4,3700(12) | -11,7406 | 1,39(8)   | 42,5 | 41,4 | 3,2774(7)  | 3,2197(9)  |
| Cg11 | Cg9  | [2645] | 5,9339(10) | -8,5931  | 79,88(6)  | 3,5  | 79,6 | 1,0734(7)  | 5,9228(7)  |
| Cg11 | Cg11 | [3666] | 5,2546(10) | -11,8957 | 0,00(6)   | 52,2 | 52,2 | 3,2231(7)  | 3,2231(7)  |

|        |                  |
|--------|------------------|
| [3565] | -X,1-Y,-Z        |
| [4554] | X,1/2-Y,-1/2+Z   |
| [2555] | -X,1/2+Y,1/2-Z   |
| [3666] | 1-X,1-Y,1-Z      |
| [2545] | -X,-1/2+Y,1/2-Z  |
| [2645] | 1-X,-1/2+Y,1/2-Z |
| [1555] | X,Y,Z            |

|        |               |
|--------|---------------|
| [4555] | X,1/2-Y,1/2+Z |
|--------|---------------|

**Analysis of X-H...Cg(Pi-Ring) Interactions (H..Cg < 3.0 Ang. - Gamma < 40.0 Deg)**

- Cg(J) = Center of gravity of ring J (Plane number above)
- H-Perp = Perpendicular distance of H to ring plane J
- Gamma = Angle between Cg-H vector and ring J normal
- X-H..Cg = X-H-Cg angle (degrees)
- X..Cg = Distance of X to Cg (Angstrom)
- X-H, Pi = Angle of the X-H bond with the Pi-plane (i.e. ' Perpendicular = 90 degrees, Parallel = 0 degrees)

| X--H(I) | Cg(J) | [ARU(J)] | H..Cg | H-Perp | Gamma | X-H..Cg | X..Cg    | X-H,Pi |
|---------|-------|----------|-------|--------|-------|---------|----------|--------|
| C9-H9   | Cg11  | [2655]   | 2,86  | -2,7   | 19,39 | 132     | 3,566(2) | 60     |
| C10-H10 | Cg7   | [2655]   | 2,84  | -2,75  | 14,23 | 135     | 3,578(2) | 58     |
| C36-H36 | Cg5   | [1555]   | 2,75  | 2,64   | 16,34 | 146     | 3,575(2) | 70     |
| C36-H36 | Cg10  | [1555]   | 2,65  | 2,62   | 9,49  | 159     | 3,558(2) | 70     |

|        |                 |
|--------|-----------------|
| [2655] | 1-X,1/2+Y,1/2-Z |
|--------|-----------------|

|        |       |
|--------|-------|
| [1555] | X,Y,Z |
|--------|-------|

**Analysis of Y-X...Cg(Pi-Ring) Interactions (X..Cg < 4.0 Ang. - Gamma < 30.0 Deg)**

| Y--X(I) | Cg(J) | [ARU(J)] | X..Cg      | X-Perp | Gamma | Y-X..Cg    | Y..Cg    | Y-X,Pi |
|---------|-------|----------|------------|--------|-------|------------|----------|--------|
| C15-F4  | Cg4   | [2645]   | 3,2210(16) | 3,208  | 5,17  | 132,94(12) | 4,252(2) | 41,72  |
| C15-F4  | Cg9   | [2645]   | 3,4319(15) | 3,21   | 20,7  | 150,86(12) | 4,652(2) | 41,39  |

|        |                  |
|--------|------------------|
| [2645] | 1-X,-1/2+Y,1/2-Z |
|--------|------------------|

The Cg(I) refer to the Ring Centre-of-Gravity numbers given in ( ) in the Ring-Analysis above.

| Cg(I) | x           | y          | z           |
|-------|-------------|------------|-------------|
| Cg1   | 0,22101(9)  | 0,48531(4) | -0,01282(5) |
| Cg2   | -0,02996(8) | 0,38490(4) | 0,08647(5)  |
| Cg3   | 0,10240(8)  | 0,70712(4) | 0,18341(5)  |
| Cg4   | 0,21968(8)  | 0,78052(4) | 0,12683(5)  |
| Cg5   | 0,26169(8)  | 0,26870(4) | 0,42407(5)  |
| Cg6   | 0,15983(8)  | 0,26193(5) | 0,53719(5)  |
| Cg7   | 0,59099(8)  | 0,43501(4) | 0,49053(5)  |
| Cg8   | 0,58517(8)  | 0,36154(4) | 0,58790(5)  |
| Cg9   | 0,16100(6)  | 0,74377(3) | 0,15505(4)  |
| Cg10  | 0,21113(6)  | 0,26545(3) | 0,48076(4)  |
| Cg11  | 0,58811(6)  | 0,39818(3) | 0,53906(4)  |

**Table S6.** Non-coordinative interactions in **4**.

6-Membered Ring (1) N1 --> C43 --> C44 --> C45 --> C46 --> C47 -->  
 6-Membered Ring (2) N2 --> C49 --> C50 --> C51 --> C52 --> C53 -->  
 6-Membered Ring (3) C5 --> C6 --> C7 --> C12 --> C13 --> C14 -->  
 6-Membered Ring (4) C7 --> C8 --> C9 --> C10 --> C11 --> C12 -->  
 6-Membered Ring (5) C19 --> C20 --> C21 --> C26 --> C27 --> C28 -->  
 6-Membered Ring (6) C21 --> C22 --> C23 --> C24 --> C25 --> C26 -->  
 6-Membered Ring (7) C33 --> C34 --> C35 --> C40 --> C41 --> C42 -->  
 6-Membered Ring (8) C35 --> C36 --> C37 --> C38 --> C39 --> C40 -->

**Analysis of Short Ring-Interactions with Cg-Cg Distances < 6.0 Ang., Alpha < 20.000 Deg. and Beta < 60.0 Deg.**

- Cg(I) = Plane number I (= ring number in () above)
- Alpha = Dihedral Angle between Planes I and J (Deg)
- Beta = Angle Cg(I)-->Cg(J) or Cg(I)-->Me vector and normal to plane I (Deg)
- Gamma = Angle Cg(I)-->Cg(J) vector and normal to plane J (Deg)
- Cg-Cg = Distance between ring Centroids (Ang.)
- CgI\_Perp = Perpendicular distance of Cg(I) on ring J (Ang.)
- CgJ\_Perp = Perpendicular distance of Cg(J) on ring I (Ang.)
- Slippage = Distance between Cg(I) and Perpendicular Projection of Cg(J) on Ring I (Ang.).

| Cg(I) | Cg(J) | [ARU(J)] | Cg-Cg    | Alpha   | Beta      | Gamma | CgI_Perp | CgJ_Perp   | Slippage   |
|-------|-------|----------|----------|---------|-----------|-------|----------|------------|------------|
| Cg1   | Cg7   | [4465]   | 4,998(2) | -1,2785 | 42,94(17) | 28    | 63,3     | 2,2450(16) | 4,4112(14) |
| Cg1   | Cg8   | [3654]   | 5,894(2) | 8,5233  | 85,22(18) | 25,1  | 79,6     | 1,0596(16) | 5,3386(15) |
| Cg2   | Cg3   | [1565]   | 5,547(2) | 13,43   | 29,49(18) | 58,9  | 34,9     | 4,5484(15) | 2,8654(15) |
| Cg2   | Cg6   | [1565]   | 4,688(2) | -2,859  | 40,52(18) | 58,3  | 28,7     | 4,1111(15) | 2,4628(16) |
| Cg2   | Cg7   | [4465]   | 4,669(2) | -1,2785 | 55,79(17) | 21,3  | 41,2     | 3,5130(14) | 4,3500(14) |
| Cg2   | Cg8   | [4465]   | 4,893(2) | -0,3895 | 55,89(18) | 20    | 44,2     | 3,5063(14) | 4,5989(15) |
| Cg3   | Cg2   | [1545]   | 5,547(2) | 2,9256  | 29,49(18) | 34,9  | 58,9     | 2,8656(15) | 4,5484(15) |
| Cg3   | Cg5   | [4555]   | 3,588(2) | 11,7409 | 4,86(17)  | 16,5  | 16       | 3,4485(15) | 3,4397(15) |
| Cg3   | Cg6   | [4555]   | 3,856(2) | 11,7256 | 5,71(18)  | 23,1  | 26,9     | 3,4388(15) | 3,5458(15) |
| Cg4   | Cg5   | [4555]   | 3,829(2) | 11,7409 | 8,26(18)  | 25,4  | 33,4     | 3,1950(16) | 3,4574(15) |
| Cg4   | Cg6   | [4555]   | 5,242(2) | 11,7256 | 8,74(18)  | 44,5  | 52,7     | 3,1765(16) | 3,7372(15) |
| Cg5   | Cg2   | [1545]   | 4,386(2) | 2,9256  | 39,38(17) | 21,3  | 60,2     | 2,1814(15) | 4,0866(15) |
| Cg5   | Cg3   | [4455]   | 3,588(2) | -0,5887 | 4,86(17)  | 16    | 16,5     | 3,4399(15) | 3,4487(15) |
| Cg5   | Cg4   | [4455]   | 3,829(2) | -1,4134 | 8,26(18)  | 33,4  | 25,4     | 3,4575(15) | 3,1950(16) |
| Cg6   | Cg1   | [1545]   | 5,433(2) | 0,9641  | 55,69(18) | 31,9  | 76       | 1,3145(15) | 4,6106(15) |
| Cg6   | Cg2   | [1545]   | 4,688(2) | 2,9256  | 40,52(18) | 28,7  | 58,3     | 2,4627(16) | 4,1111(15) |
| Cg6   | Cg3   | [4455]   | 3,856(2) | -0,5887 | 5,71(18)  | 26,9  | 23,1     | 3,5458(15) | 3,4389(15) |
| Cg6   | Cg4   | [4455]   | 5,242(2) | -1,4134 | 8,74(18)  | 52,7  | 44,5     | 3,7372(15) | 3,1765(16) |
| Cg7   | Cg2   | [4565]   | 4,669(2) | 11,1606 | 55,79(17) | 41,2  | 21,3     | 4,3499(14) | 3,5130(14) |
| Cg7   | Cg3   | [1565]   | 5,855(2) | 13,43   | 88,28(17) | 36,2  | 76       | 1,4167(14) | 4,7268(15) |
| Cg7   | Cg4   | [1565]   | 5,440(2) | 12,4531 | 88,05(17) | 16,8  | 73,2     | 1,5723(14) | 5,2081(16) |
| Cg7   | Cg5   | [4555]   | 5,673(2) | 11,7409 | 84,91(17) | 16,8  | 74,8     | 1,4922(14) | 5,4314(15) |
| Cg7   | Cg6   | [4555]   | 5,094(2) | 11,7256 | 83,76(17) | 17,5  | 71,8     | 1,5926(14) | 4,8587(15) |
| Cg8   | Cg2   | [4565]   | 4,893(2) | 11,1606 | 55,89(18) | 44,2  | 20       | 4,5990(15) | 3,5063(14) |
| Cg8   | Cg5   | [4555]   | 5,527(2) | 11,7409 | 84,74(17) | 11,6  | 77       | 1,2400(15) | 5,4145(15) |
| Cg8   | Cg6   | [4555]   | 5,995(2) | 11,7256 | 83,59(18) | 33,7  | 77,1     | 1,3389(15) | 4,9862(15) |



|        |                |
|--------|----------------|
| [4465] | -1/2+X,1-Y,Z   |
| [3654] | 3/2-X,Y,-1/2+Z |
| [1565] | X,1+Y,Z        |
| [1545] | X,-1+Y,Z       |
| [4555] | 1/2+X,-Y,Z     |
| [4455] | -1/2+X,-Y,Z    |
| [4565] | 1/2+X,1-Y,Z    |

#### Analysis of X-H...Cg(Pi-Ring) Interactions (H..Cg < 3.0 Ang. - Gamma < 40.0 Deg)

- Cg(J) = Center of gravity of ring J (Plane number above)
- H-Perp = Perpendicular distance of H to ring plane J
- Gamma = Angle between Cg-H vector and ring J normal
- X-H..Cg = X-H-Cg angle (degrees)
- X..Cg = Distance of X to Cg (Angstrom)
- X-H, Pi = Angle of the X-H bond with the Pi-plane (i.e. ' Perpendicular = 90 degrees, Parallel = 0 degrees)

| X--H(I)  | Cg(J) | [ARU(J)] | H..Cg | H-Perp | Gamma | X-H..Cg | X..Cg    | X-H,Pi |
|----------|-------|----------|-------|--------|-------|---------|----------|--------|
| C25-H25  | Cg7   | [4455]   | 2,95  | -2,58  | 28,94 | 148     | 3,789(4) | 76     |
| C51-H51  | Cg5   | [1565]   | 2,76  | 2,73   | 8,22  | 118     | 3,312(4) | 35     |
| C54-H54A | Cg3   | [1565]   | 2,98  | -2,92  | 11,53 | 121     | 3,583(4) | 40     |

|        |             |
|--------|-------------|
| [4455] | -1/2+X,-Y,Z |
| [1565] | X,1+Y,Z     |

#### Analysis of Y-X...Cg(Pi-Ring) Interactions (X..Cg < 4.0 Ang. - Gamma < 30.0 Deg)

| Y--X(I) | Cg(J) | [ARU(J)] | X..Cg    | X-Perp | Gamma | Y-X..Cg  | Y,,Cg    | Y-X,Pi |
|---------|-------|----------|----------|--------|-------|----------|----------|--------|
| C15-F5  | Cg1   | [2665]   | 3,471(7) | -3,123 | 25,87 | 136,3(4) | 4,566(5) | 20,58  |
| C29-F7  | Cg8   | [3654]   | 3,048(3) | 3,047  | 1,45  | 127,0(2) | 3,991(4) | 35,89  |
| C29-F9  | Cg2   | [1555]   | 3,863(3) | 3,38   | 28,98 | 97,7(2)  | 4,250(4) | 34,83  |

|        |                |
|--------|----------------|
| [2665] | 1-X,1-Y,1/2+Z  |
| [3654] | 3/2-X,Y,-1/2+Z |
| [1555] | X,Y,Z          |

The Cg(I) refer to the Ring Centre-of-Gravity numbers given in ( ) in the Ring-Analysis above.

| Cg(I) | x          | y            | z          |
|-------|------------|--------------|------------|
| Cg1   | 0,39767(7) | 0,45343(14)  | 0,31004(8) |
| Cg2   | 0,49854(8) | 0,66617(12)  | 0,44674(8) |
| Cg3   | 0,70763(7) | -0,05347(12) | 0,51533(8) |
| Cg4   | 0,76853(8) | -0,07812(13) | 0,62182(8) |
| Cg5   | 0,37213(7) | -0,03713(12) | 0,47400(8) |
| Cg6   | 0,30340(8) | -0,14042(12) | 0,39233(8) |
| Cg7   | 0,80848(7) | 0,48717(12)  | 0,54508(7) |
| Cg8   | 0,85941(8) | 0,40455(13)  | 0,64644(8) |

**Table S7. Non-coordinative interactions in 5.**

|                       |     |     |     |     |     |     |     |     |     |     |     |     |     |     |     |     |     |     |     |     |
|-----------------------|-----|-----|-----|-----|-----|-----|-----|-----|-----|-----|-----|-----|-----|-----|-----|-----|-----|-----|-----|-----|
| 6-Membered Ring (1)   | N1  | --> | C43 | --> | C44 | --> | C45 | --> | C46 | --> | C47 | --> |     |     |     |     |     |     |     |     |
| 6-Membered Ring (2)   | N2  | --> | C48 | --> | C49 | --> | C50 | --> | C51 | --> | C52 | --> |     |     |     |     |     |     |     |     |
| 6-Membered Ring (3)   | C5  | --> | C6  | --> | C7  | --> | C12 | --> | C13 | --> | C14 | --> |     |     |     |     |     |     |     |     |
| 6-Membered Ring (4)   | C7  | --> | C8  | --> | C9  | --> | C10 | --> | C11 | --> | C12 | --> |     |     |     |     |     |     |     |     |
| 6-Membered Ring (5)   | C19 | --> | C20 | --> | C21 | --> | C26 | --> | C27 | --> | C28 | --> |     |     |     |     |     |     |     |     |
| 6-Membered Ring (6)   | C21 | --> | C22 | --> | C23 | --> | C24 | --> | C25 | --> | C26 | --> |     |     |     |     |     |     |     |     |
| 6-Membered Ring (7)   | C33 | --> | C34 | --> | C35 | --> | C40 | --> | C41 | --> | C42 | --> |     |     |     |     |     |     |     |     |
| 6-Membered Ring (8)   | C35 | --> | C36 | --> | C37 | --> | C38 | --> | C39 | --> | C40 | --> |     |     |     |     |     |     |     |     |
| 10-Membered Ring (9)  | C5  | --> | C6  | --> | C7  | --> | C8  | --> | C9  | --> | C10 | --> | C11 | --> | C12 | --> | C13 | --> | C14 | --> |
| 10-Membered Ring (10) | C19 | --> | C20 | --> | C21 | --> | C22 | --> | C23 | --> | C24 | --> | C25 | --> | C26 | --> | C27 | --> | C28 | --> |
| 10-Membered Ring (11) | C33 | --> | C34 | --> | C35 | --> | C36 | --> | C37 | --> | C38 | --> | C39 | --> | C40 | --> | C41 | --> | C42 | --> |

**Analysis of Short Ring-Interactions with Cg-Cg Distances < 6.0 Ang., Alpha < 20.000 Deg. and Beta < 60.0 Deg.**

- Cg(I) = Plane number I (= ring number in () above)
- Alpha = Dihedral Angle between Planes I and J (Deg)
- Beta = Angle Cg(I)-->Cg(J) or Cg(I)-->Me vector and normal to plane I (Deg)
- Gamma = Angle Cg(I)-->Cg(J) vector and normal to plane J (Deg)
- Cg-Cg = Distance between ring Centroids (Ang.)
- CgI\_Perp = Perpendicular distance of Cg(I) on ring J (Ang.)
- CgJ\_Perp = Perpendicular distance of Cg(J) on ring I (Ang.)
- Slippage = Distance between Cg(I) and Perpendicular Projection of Cg(J) on Ring I (Ang.)

| Cg(I) | Cg(J) | [ARU(J)] | Cg-Cg      | Alpha   | Beta      | Gamma | CgI_Perp | CgJ_Perp   | Slippage   |
|-------|-------|----------|------------|---------|-----------|-------|----------|------------|------------|
| Cg1   | Cg5   | [2655]   | 3,6878(11) | -2,9622 | 8,72(9)   | 27,5  | 20,3     | 3,4586(8)  | 3,2714(8)  |
| Cg1   | Cg6   | [2655]   | 4,2954(12) | -3,2437 | 12,55(10) | 30,7  | 38,9     | 3,3441(8)  | 3,6928(9)  |
| Cg1   | Cg8   | [2655]   | 5,6028(12) | 6,3688  | 79,64(10) | 29,3  | 82,5     | 0,7277(8)  | 4,8864(9)  |
| Cg1   | Cg10  | [2655]   | 3,8201(10) | -3,0445 | 10,59(8)  | 24    | 25       | 3,4633(8)  | 3,4906(7)  |
| Cg1   | Cg11  | [2655]   | 5,8378(11) | 6,7962  | 80,81(8)  | 39,3  | 81,3     | 0,8783(8)  | 4,5154(7)  |
| Cg2   | Cg3   | [1555]   | 4,9124(11) | 0,2704  | 61,43(10) | 8,1   | 68,4     | 1,8093(8)  | 4,8640(8)  |
| Cg2   | Cg4   | [1555]   | 5,5595(12) | 0,7828  | 62,76(10) | 23,1  | 72,4     | 1,6784(8)  | 5,1132(9)  |
| Cg2   | Cg5   | [2655]   | 4,7618(11) | -2,9622 | 14,58(9)  | 43,5  | 55,9     | 2,6696(8)  | 3,4558(8)  |
| Cg2   | Cg7   | [1555]   | 5,3378(12) | 6,1495  | 63,24(10) | 23,5  | 39,8     | 4,1015(8)  | 4,8933(8)  |
| Cg2   | Cg7   | [2655]   | 5,8847(12) | 7,267   | 76,67(10) | 46,1  | 57,5     | 3,1636(8)  | 4,0824(8)  |
| Cg2   | Cg9   | [1555]   | 5,1031(11) | 0,5007  | 62,07(8)  | 12,1  | 69,8     | 1,7651(8)  | 4,9902(7)  |
| Cg2   | Cg10  | [2655]   | 5,7990(11) | -3,0445 | 16,94(8)  | 48,8  | 64,5     | 2,4948(8)  | 3,8189(7)  |
| Cg2   | Cg11  | [1555]   | 5,6510(11) | 6,2483  | 62,06(8)  | 23,5  | 42,3     | 4,1784(8)  | 5,1835(7)  |
| Cg3   | Cg3   | [3666]   | 3,6685(12) | 3,1596  | 0,00(10)  | 20,8  | 20,8     | 3,4300(8)  | 3,4300(8)  |
| Cg3   | Cg4   | [3666]   | 5,0530(13) | 2,7474  | 1,90(10)  | 47,7  | 46,2     | 3,4973(8)  | 3,3992(10) |
| Cg3   | Cg7   | [2655]   | 3,7701(12) | 7,267   | 15,45(10) | 18,6  | 11,4     | 3,6963(9)  | 3,5741(9)  |
| Cg3   | Cg8   | [2655]   | 4,0514(13) | 6,3688  | 13,64(10) | 35,6  | 24,4     | 3,6900(9)  | 3,2926(9)  |
| Cg3   | Cg9   | [3666]   | 4,2405(11) | 2,9409  | 0,93(8)   | 36,4  | 35,7     | 3,4445(8)  | 3,4115(7)  |
| Cg3   | Cg11  | [2655]   | 3,7140(11) | 6,7962  | 14,50(8)  | 22,5  | 8,6      | 3,6719(9)  | 3,4303(7)  |
| Cg4   | Cg3   | [3666]   | 5,0530(13) | 3,1596  | 1,90(10)  | 46,2  | 47,7     | 3,3992(10) | 3,4974(8)  |
| Cg4   | Cg7   | [2655]   | 4,1323(13) | 7,267   | 14,46(11) | 30    | 24,3     | 3,7672(10) | 3,5772(9)  |
| Cg4   | Cg8   | [2655]   | 5,5315(13) | 6,3688  | 13,04(11) | 54    | 45,5     | 3,8767(10) | 3,2498(9)  |
| Cg4   | Cg11  | [2655]   | 4,7241(12) | 6,7962  | 13,69(9)  | 43,8  | 36,4     | 3,8029(10) | 3,4104(7)  |

|      |      |        |            |         |           |      |      |            |            |
|------|------|--------|------------|---------|-----------|------|------|------------|------------|
| Cg5  | Cg1  | [2645] | 3,6878(11) | -4,1629 | 8,72(9)   | 20,3 | 27,5 | 3,2713(8)  | 3,4588(8)  |
| Cg5  | Cg2  | [2645] | 4,7619(11) | -5,1016 | 14,58(9)  | 55,9 | 43,5 | 3,4557(8)  | 2,6697(8)  |
| Cg5  | Cg3  | [3666] | 5,9585(12) | 3,1596  | 48,57(10) | 49,3 | 82,3 | 0,8019(9)  | 3,8822(8)  |
| Cg5  | Cg7  | [4555] | 5,9756(12) | 3,4431  | 63,77(10) | 18,6 | 76,3 | 1,4118(9)  | 5,6650(8)  |
| Cg5  | Cg8  | [4555] | 4,6089(12) | 4,2899  | 62,21(10) | 11,8 | 70,7 | 1,5214(9)  | 4,5118(9)  |
| Cg5  | Cg11 | [4555] | 5,1946(11) | 3,8457  | 63,02(8)  | 11,6 | 73,9 | 1,4403(9)  | 5,0879(7)  |
| Cg6  | Cg1  | [2645] | 4,2956(12) | -4,1629 | 12,55(10) | 38,9 | 30,7 | 3,6929(9)  | 3,3442(8)  |
| Cg6  | Cg8  | [4555] | 4,7836(13) | 4,2899  | 60,51(11) | 19,4 | 71,6 | 1,5060(10) | 4,5130(9)  |
| Cg6  | Cg11 | [4555] | 5,7862(11) | 3,8457  | 61,17(9)  | 26,9 | 75   | 1,4928(10) | 5,1622(7)  |
| Cg7  | Cg2  | [1555] | 5,3379(12) | 7,1189  | 63,24(10) | 39,8 | 23,5 | 4,8933(8)  | 4,1015(8)  |
| Cg7  | Cg2  | [2645] | 5,8847(12) | -5,1016 | 76,67(10) | 57,5 | 46,1 | 4,0824(8)  | 3,1637(8)  |
| Cg7  | Cg3  | [2645] | 3,7700(12) | 2,0352  | 15,45(10) | 11,4 | 18,6 | 3,5741(9)  | 3,6962(9)  |
| Cg7  | Cg4  | [2645] | 4,1323(13) | 1,946   | 14,46(11) | 24,3 | 30   | 3,5772(9)  | 3,7672(10) |
| Cg7  | Cg5  | [2655] | 4,9800(13) | -2,9622 | 63,77(10) | 30,5 | 65,8 | 2,0397(8)  | 4,2928(9)  |
| Cg7  | Cg9  | [2645] | 3,7651(12) | 1,9726  | 14,95(9)  | 7,3  | 17,3 | 3,5950(9)  | 3,7347(7)  |
| Cg7  | Cg10 | [2655] | 5,7341(12) | -3,0445 | 62,74(9)  | 40,6 | 67,4 | 2,2036(8)  | 4,3507(7)  |
| Cg8  | Cg3  | [2645] | 4,0514(13) | 2,0352  | 13,64(10) | 24,4 | 35,6 | 3,2925(9)  | 3,6899(9)  |
| Cg8  | Cg4  | [2645] | 5,5315(13) | 1,946   | 13,04(11) | 45,5 | 54   | 3,2498(9)  | 3,8767(10) |
| Cg8  | Cg9  | [2645] | 4,6941(12) | 1,9726  | 13,32(9)  | 36,2 | 45,5 | 3,2908(9)  | 3,7863(7)  |
| Cg9  | Cg3  | [3666] | 4,2407(11) | 3,1596  | 0,93(8)   | 35,7 | 36,4 | 3,4116(7)  | 3,4445(8)  |
| Cg9  | Cg7  | [2655] | 3,7650(12) | 7,267   | 14,95(9)  | 17,3 | 7,3  | 3,7346(7)  | 3,5950(9)  |
| Cg9  | Cg8  | [2655] | 4,6940(12) | 6,3688  | 13,32(9)  | 45,5 | 36,2 | 3,7862(7)  | 3,2908(9)  |
| Cg9  | Cg9  | [3666] | 5,0487(10) | 2,9409  | 0,03(7)   | 47   | 47   | 3,4417(7)  | 3,4415(7)  |
| Cg9  | Cg11 | [2655] | 4,0724(10) | 6,7962  | 14,09(7)  | 32,4 | 23,3 | 3,7403(7)  | 3,4398(7)  |
| Cg10 | Cg1  | [2645] | 3,8202(10) | -4,1629 | 10,59(8)  | 25   | 24   | 3,4905(7)  | 3,4634(8)  |
| Cg10 | Cg8  | [4555] | 4,5272(11) | 4,2899  | 61,34(9)  | 10,1 | 70,5 | 1,5095(7)  | 4,4576(9)  |
| Cg10 | Cg11 | [4555] | 5,3530(10) | 3,8457  | 62,07(6)  | 18,6 | 74,1 | 1,4624(7)  | 5,0724(7)  |
| Cg11 | Cg2  | [1555] | 5,6511(11) | 7,1189  | 62,06(8)  | 42,3 | 23,5 | 5,1836(7)  | 4,1783(8)  |
| Cg11 | Cg3  | [2645] | 3,7140(11) | 2,0352  | 14,50(8)  | 8,6  | 22,5 | 3,4302(7)  | 3,6719(9)  |
| Cg11 | Cg4  | [2645] | 4,7240(12) | 1,946   | 13,69(9)  | 36,4 | 43,8 | 3,4104(7)  | 3,8029(10) |
| Cg11 | Cg5  | [2655] | 5,6551(11) | -2,9622 | 63,02(8)  | 41,7 | 62,4 | 2,6168(7)  | 4,2256(9)  |
| Cg11 | Cg9  | [2645] | 4,0725(10) | 1,9726  | 14,09(7)  | 23,3 | 32,4 | 3,4398(7)  | 3,7404(7)  |

|        |                  |
|--------|------------------|
| [2655] | 1-X,1/2+Y,1/2-Z  |
| [1555] | X,Y,Z            |
| [3666] | 1-X,1-Y,1-Z      |
| [2645] | 1-X,-1/2+Y,1/2-Z |
| [4555] | X,1/2-Y,1/2+Z    |

**Analysis of X-H...Cg(Pi-Ring) Interactions (H..Cg < 3.0 Ang. - Gamma < 40.0 Deg)**

- Cg(J) = Center of gravity of ring J (Plane number above)
- H-Perp = Perpendicular distance of H to ring plane J
- Gamma = Angle between Cg-H vector and ring J normal
- X-H..Cg = X-H-Cg angle (degrees)
- X..Cg = Distance of X to Cg (Angstrom)
- X-H, Pi = Angle of the X-H bond with the Pi-plane (i.e. ' Perpendicular = 90 degrees, Parallel = 0 degrees)

| X--H(I) | Cg(J) | [ARU(J)] | H..Cg | H-Perp | Gamma | X-H..Cg | X..Cg    | X-H,Pi |
|---------|-------|----------|-------|--------|-------|---------|----------|--------|
| C6-H6   | Cg2   | [1555]   | 2,87  | 2,82   | 10,85 | 141     | 3,658(2) | 61     |
| C38-H38 | Cg6   | [4554]   | 2,7   | 2,64   | 12,11 | 143     | 3,505(2) | 53     |
| C38-H38 | Cg10  | [4554]   | 2,7   | 2,61   | 15,28 | 127     | 3,362(2) | 52     |
| C39-H39 | Cg5   | [4554]   | 2,82  | 2,75   | 12,81 | 126     | 3,467(2) | 48     |

|        |                |
|--------|----------------|
| [1555] | X,Y,Z          |
| [4554] | X,1/2-Y,-1/2+Z |

**Analysis of Y-X...Cg(Pi-Ring) Interactions (X..Cg < 4.0 Ang. - Gamma < 30.0 Deg)**

| Y--X(I) | Cg(J) | [ARU(J)] | X..Cg      | X-Perp | Gamma | Y-X..Cg    | Y..Cg    | Y-X,Pi |
|---------|-------|----------|------------|--------|-------|------------|----------|--------|
| C15-F5  | Cg8   | [2645]   | 3,3602(19) | 3,168  | 19,45 | 144,30(16) | 4,500(3) | 60,79  |

|        |                  |
|--------|------------------|
| [2645] | 1-X,-1/2+Y,1/2-Z |
|--------|------------------|

The Cg(I) refer to the Ring Centre-of-Gravity numbers given in ( ) in the Ring-Analysis above.

| Cg(I) | x          | y          | z          |
|-------|------------|------------|------------|
| Cg1   | 0,23010(6) | 0,62895(6) | 0,24362(3) |
| Cg2   | 0,53129(6) | 0,52807(6) | 0,27263(3) |
| Cg3   | 0,53036(6) | 0,60464(6) | 0,46516(3) |
| Cg4   | 0,71522(7) | 0,63026(7) | 0,48050(4) |
| Cg5   | 0,66633(6) | 0,15999(6) | 0,38482(3) |
| Cg6   | 0,83734(7) | 0,21262(7) | 0,42390(4) |
| Cg7   | 0,46276(7) | 0,34808(6) | 0,08356(3) |
| Cg8   | 0,64006(7) | 0,33366(7) | 0,06771(4) |
| Cg9   | 0,62281(5) | 0,61728(5) | 0,47291(3) |
| Cg10  | 0,75169(5) | 0,18618(5) | 0,40468(3) |
| Cg11  | 0,55136(5) | 0,34062(5) | 0,07563(3) |

**Table S8.** Relaxation parameters values for the best fit of  $\chi_M''$  and  $\chi_M'$  vs. frequency using the generalised Debye model for compound **2**.

| T (K)   | $\chi_S$ (cm <sup>3</sup> ·mol <sup>-1</sup> ) | $\chi_T$ (cm <sup>3</sup> ·mol <sup>-1</sup> ) | $\tau$ (s) | $\alpha$ |
|---------|------------------------------------------------|------------------------------------------------|------------|----------|
| 2.29606 | 0.02755                                        | 0.29478                                        | 9.23953E-4 | 0.17948  |
| 2.39807 | 0.02736                                        | 0.28325                                        | 8.09901E-4 | 0.16875  |
| 2.54207 | 0.0266                                         | 0.26706                                        | 6.5736E-4  | 0.1529   |
| 2.70185 | 0.02639                                        | 0.25234                                        | 5.31087E-4 | 0.13569  |
| 2.85219 | 0.02633                                        | 0.23848                                        | 4.26354E-4 | 0.11536  |
| 3.00445 | 0.02657                                        | 0.22569                                        | 3.42105E-4 | 0.09469  |
| 3.15329 | 0.02579                                        | 0.21509                                        | 2.73913E-4 | 0.0804   |
| 3.30222 | 0.02709                                        | 0.2049                                         | 2.21347E-4 | 0.06166  |
| 3.44963 | 0.0272                                         | 0.19565                                        | 1.79234E-4 | 0.04921  |
| 3.60098 | 0.02602                                        | 0.18754                                        | 1.43677E-4 | 0.03963  |
| 3.76045 | 0.0295                                         | 0.18015                                        | 1.20913E-4 | 0.02297  |
| 3.90673 | 0.02632                                        | 0.17356                                        | 9.57657E-5 | 0.02538  |
| 4.05689 | 0.02781                                        | 0.16717                                        | 7.99235E-5 | 0.01692  |
| 4.20239 | 0.02679                                        | 0.16131                                        | 6.52605E-5 | 0.01499  |
| 4.36281 | 0.02941                                        | 0.1561                                         | 5.58924E-5 | 0.00433  |

**Table S9.** Relaxation parameters values

for the best fit of  $\chi_M''$  and  $\chi_M'$  vs. frequency using the generalised Debye model for compound **4**.

| T (K) | $\chi_S$ (cm <sup>3</sup> ·mol <sup>-1</sup> ) | $\chi_T$ (cm <sup>3</sup> ·mol <sup>-1</sup> ) | $\tau$ (s) | $\alpha$ |
|-------|------------------------------------------------|------------------------------------------------|------------|----------|
| 1.8   | 0.03039                                        | 0.31192                                        | 8.73052E-4 | 0.1967   |
| 1.9   | 0.02928                                        | 0.29636                                        | 7.67258E-4 | 0.1892   |
| 2.0   | 0.02892                                        | 0.28123                                        | 6.73516E-4 | 0.17826  |
| 2.1   | 0.02846                                        | 0.26803                                        | 5.93904E-4 | 0.16907  |
| 2.3   | 0.02846                                        | 0.24737                                        | 4.71799E-4 | 0.154    |
| 2.5   | 0.0279                                         | 0.22795                                        | 3.6437E-4  | 0.13096  |
| 2.7   | 0.02913                                        | 0.21148                                        | 2.84815E-4 | 0.10381  |
| 2.9   | 0.02863                                        | 0.19738                                        | 2.16885E-4 | 0.08352  |
| 3.1   | 0.02847                                        | 0.18523                                        | 1.63182E-4 | 0.06346  |
| 3.3   | 0.03085                                        | 0.17401                                        | 1.27623E-4 | 0.03929  |

**Table S10.** Relaxation parameters values for the best fit of  $\chi_M''$  and  $\chi_M'$  vs. frequency using the generalised Debye model for compound **5**.

| T (K)   | $\chi_s$ (cm <sup>3</sup> ·mol <sup>-1</sup> ) | $\chi_T$ (cm <sup>3</sup> ·mol <sup>-1</sup> ) | $\tau$ (s) | $\alpha$    |
|---------|------------------------------------------------|------------------------------------------------|------------|-------------|
| 1.79864 | 0.02137                                        | 0.2703                                         | 0.00399    | 0.17531     |
| 1.88865 | 0.02074                                        | 0.27084                                        | 0.00376    | 0.18503     |
| 2.00725 | 0.01913                                        | 0.26231                                        | 0.00325    | 0.18583     |
| 2.09224 | 0.0188                                         | 0.25183                                        | 0.00276    | 0.17437     |
| 2.19807 | 0.01669                                        | 0.2542                                         | 0.00259    | 0.18892     |
| 2.2963  | 0.01698                                        | 0.24791                                        | 0.00218    | 0.17928     |
| 2.39747 | 0.01633                                        | 0.24185                                        | 0.00183    | 0.17102     |
| 2.54297 | 0.01684                                        | 0.22759                                        | 0.00133    | 0.14239     |
| 2.69744 | 0.01749                                        | 0.214                                          | 9.52479E-4 | 0.11166     |
| 2.85596 | 0.01771                                        | 0.20237                                        | 6.88583E-4 | 0.09262     |
| 3.00628 | 0.01773                                        | 0.19181                                        | 4.99809E-4 | 0.07115     |
| 3.15398 | 0.01697                                        | 0.18209                                        | 3.6221E-4  | 0.05586     |
| 3.30182 | 0.01752                                        | 0.17348                                        | 2.66954E-4 | 0.0417      |
| 3.45023 | 0.01831                                        | 0.16543                                        | 1.99802E-4 | 0.02615     |
| 3.59888 | 0.01692                                        | 0.15943                                        | 1.48855E-4 | 0.02722     |
| 3.76099 | 0.01886                                        | 0.15311                                        | 1.15559E-4 | 0.01387     |
| 3.90686 | 0.01697                                        | 0.147                                          | 8.65863E-5 | 0.0086      |
| 4.05704 | 0.01714                                        | 0.14217                                        | 6.7255E-5  | 0.01414     |
| 4.20375 | 0.02078                                        | 0.13723                                        | 5.53884E-5 | 1.30256E-14 |
